# Supplementary material for: Multifunctional Nanoparticles with Superparamagnetic Mn(II) Ferrite and Luminescent Gold Nanoclusters for Multimodal Imaging
Source: Preprints.org preprint supplement (doi:10.20944/preprints202310.0032.v1), 2023-10-02
Supplement: Supplementary file 1 [file supplementary]

**Supporting Information**

Multifunctional nanoparticles with superparamagnetic manganese(II) ferrite and gold nanoclusters for multimodal imaging

*Bárbara Casteleiro,a,b Mariana Rocha,b,[[1]](#footnote-1) Ana R. Sousa,b,c André M. Pereira,c José M. G. Martinho,a Clara Pereira,b José P. S. Farinhaa*

a Centro de Química Estrutural e Departamento de Engenharia Química, Instituto Superior Técnico, Universidade de Lisboa, 1049-001 Lisboa, Portugal

b REQUIMTE/LAQV, Departamento de Química e Bioquímica, Faculdade de Ciências, Universidade do Porto, Rua do Campo Alegre s/n, 4169-007, Porto, Portugal

c IFIMUP-Instituto de Física de Materiais Avançados, Nanotecnologia e Fotónica, Departamento de Física e Astronomia, Faculdade de Ciências, Universidade do Porto, Rua do Campo Alegre s/n, 4169-007, Porto, Portugal

E-mail: E-mail: [jgmartinho@tecnico.ulisboa.pt](mailto:jgmartinho@tecnico.ulisboa.pt); [farinha@tecnico.ulisboa.pt](mailto:farinha@tecnico.ulisboa.pt); [clara.pereira@fc.up.pt](mailto:clara.pereira@fc.up.pt)


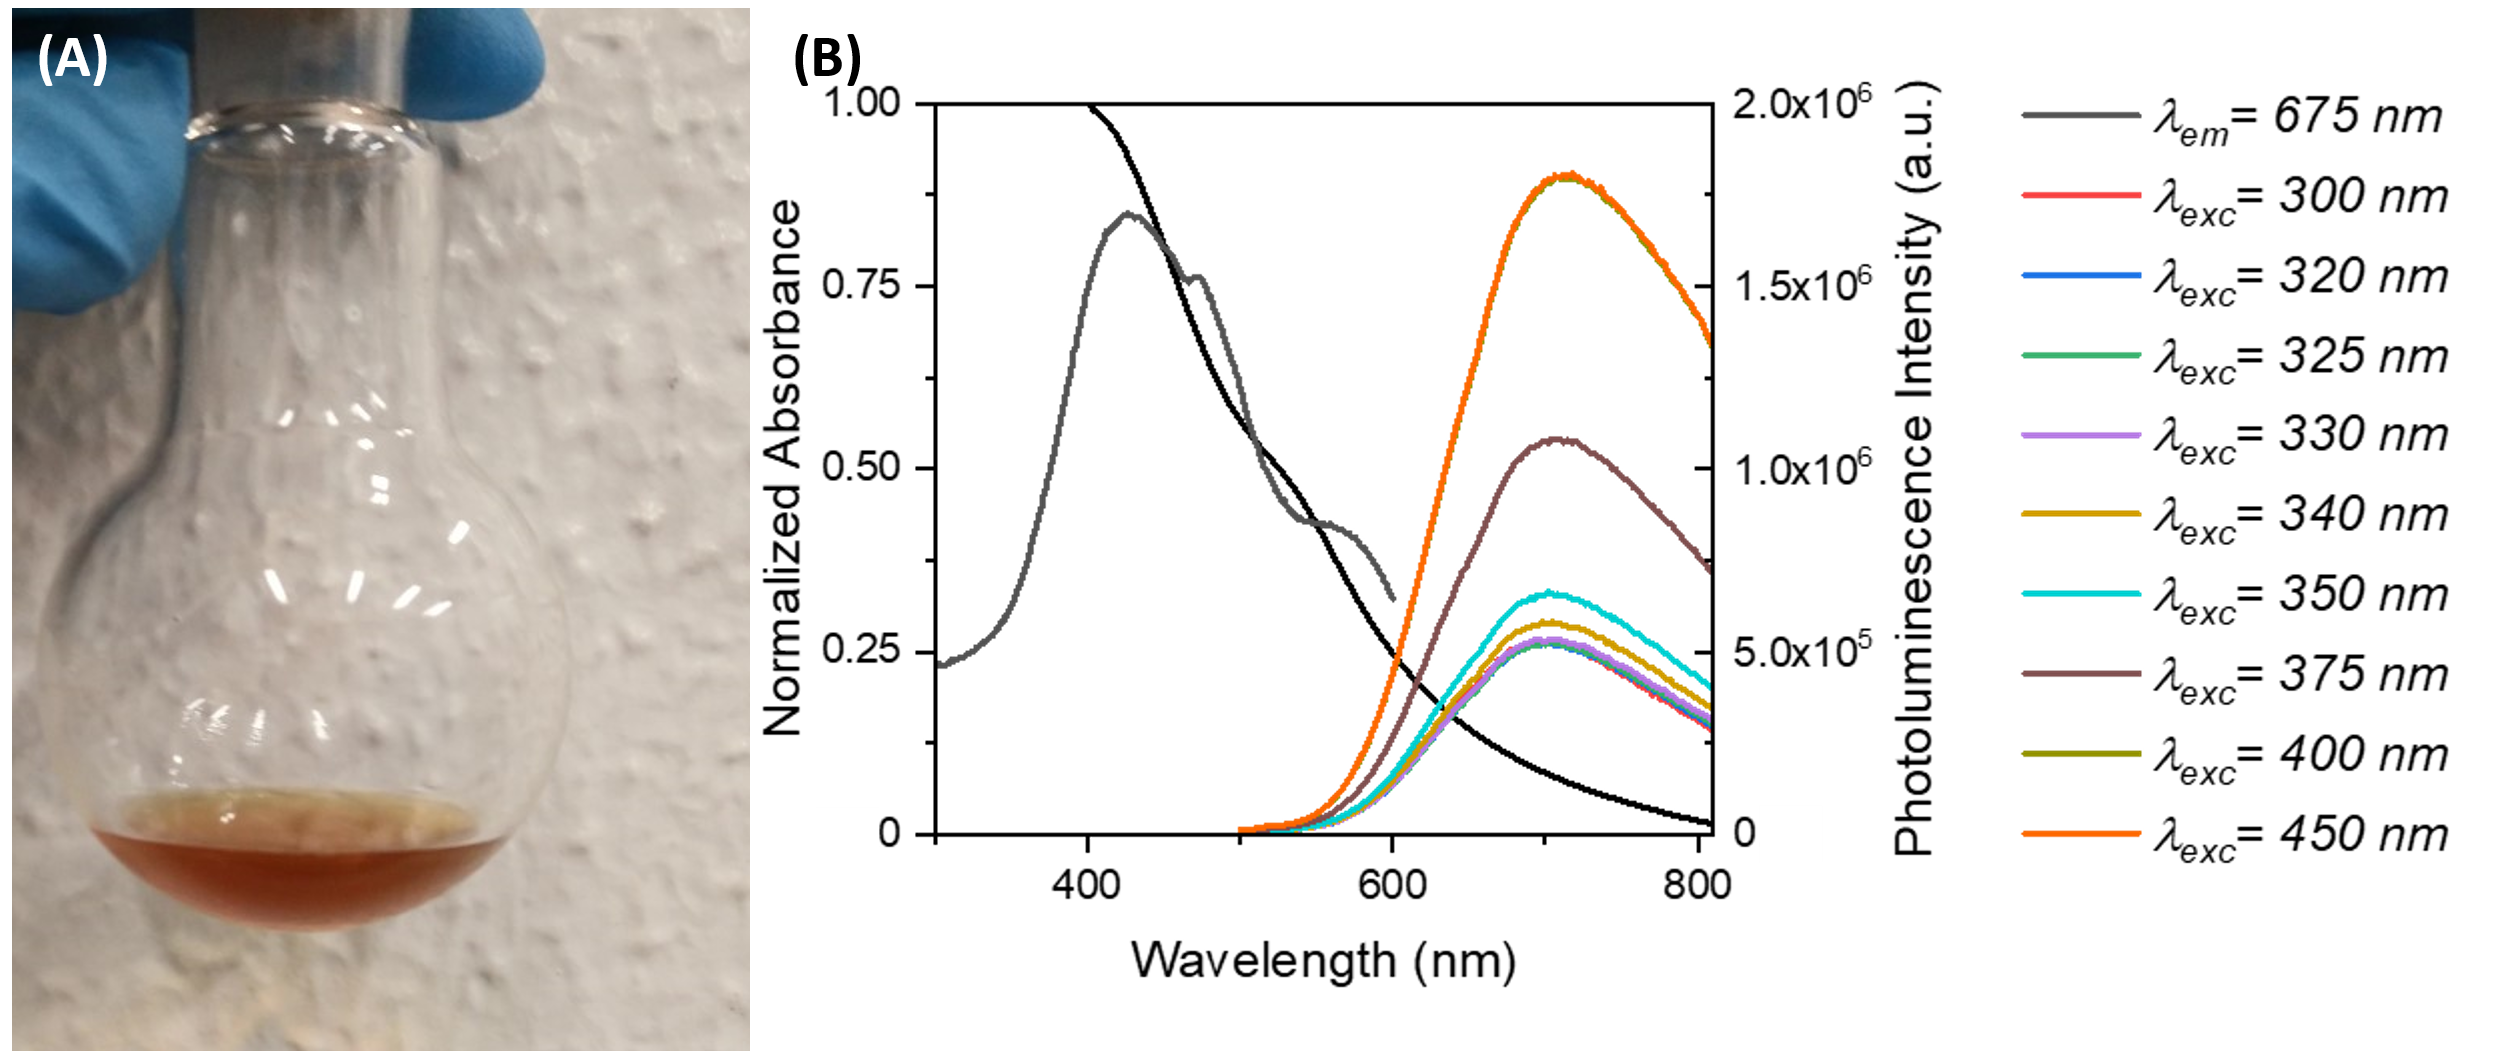


**Figure S1.** Characterization of MPTS-AuNCs in ethanol: (A) Photography of the dispersion after synthesis. (B) Linear optical properties. The MPTS-AuNCs show a Stokes shift of 290 nm, with photoluminescence excitation maximum *λ*excmax = 425 nm and emission maximum *λ*emmax = 715 nm. Similar photoluminescence emission band regardless of the excitation wavelength, which is an indication of only one population of AuNCs


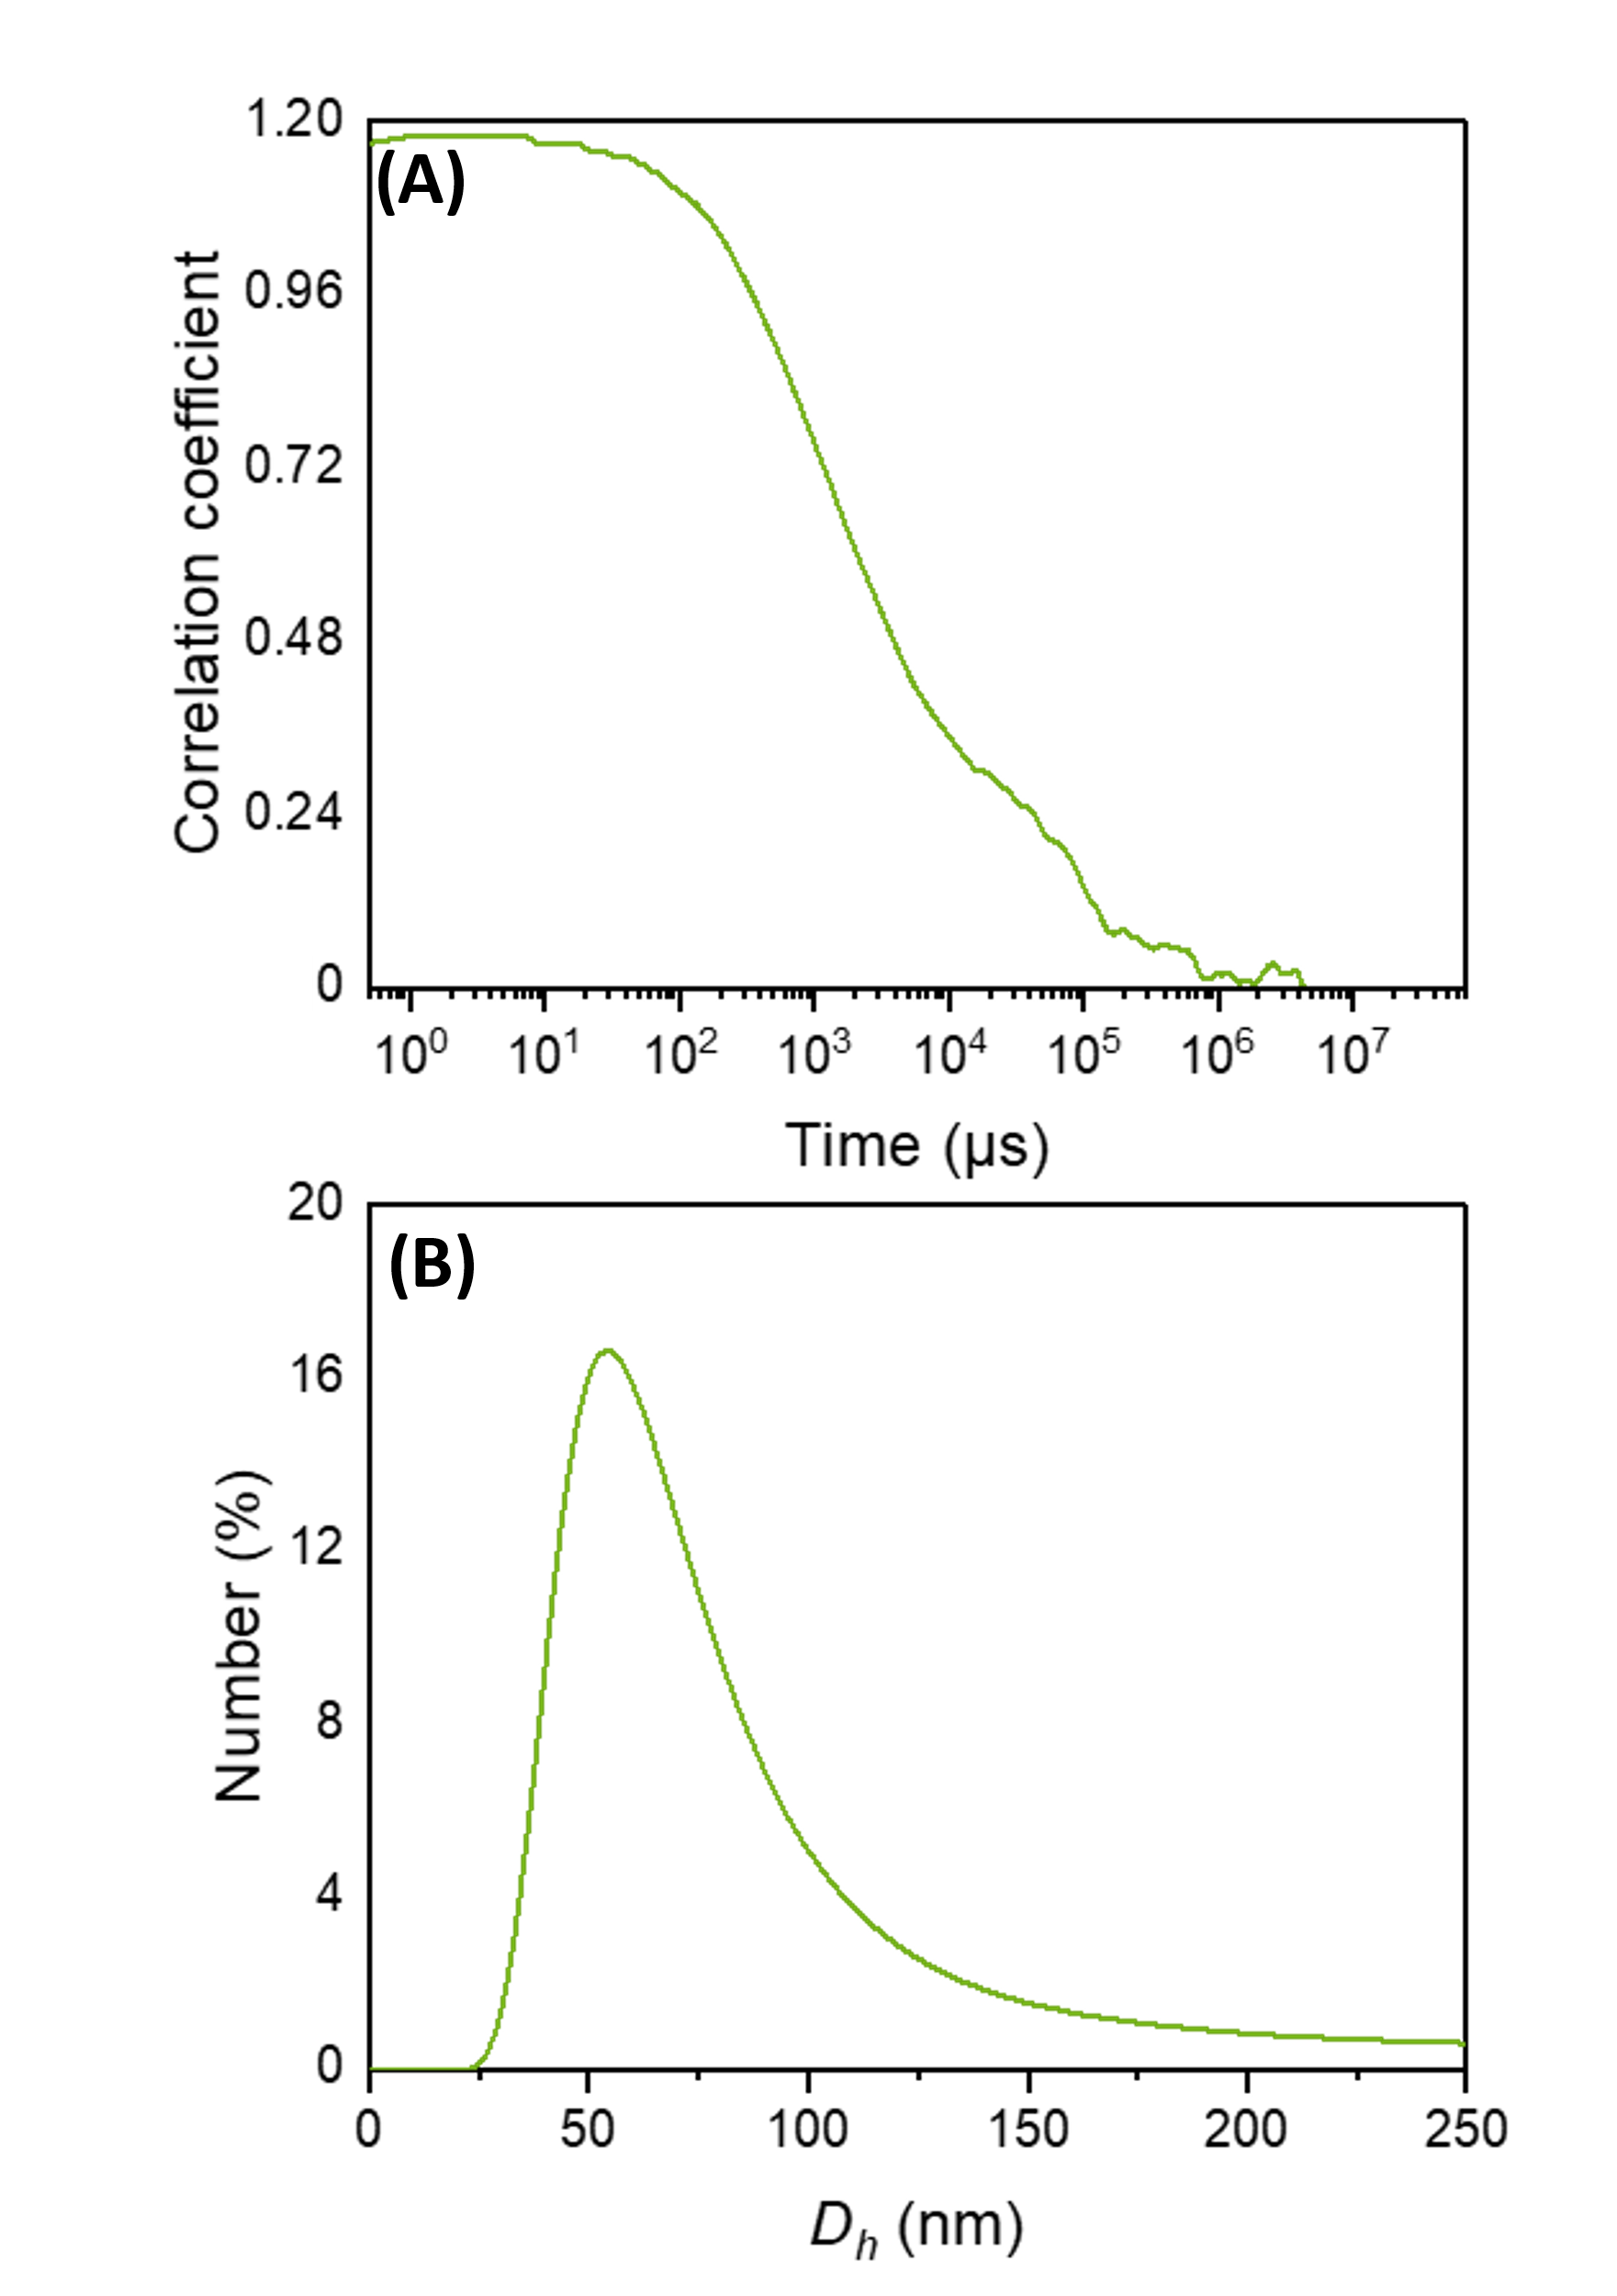


**Figure S2.** Dynamic light scattering of MPTS-AuNCs@MSN in water: (A) Autocorrelation curve. (B) Hydrodynamic diameter distribution curve by number. The autocorrelation curve shows a noisy baseline, indicating sedimentation of the MPTS-AuNCs@MSN during the measurements.


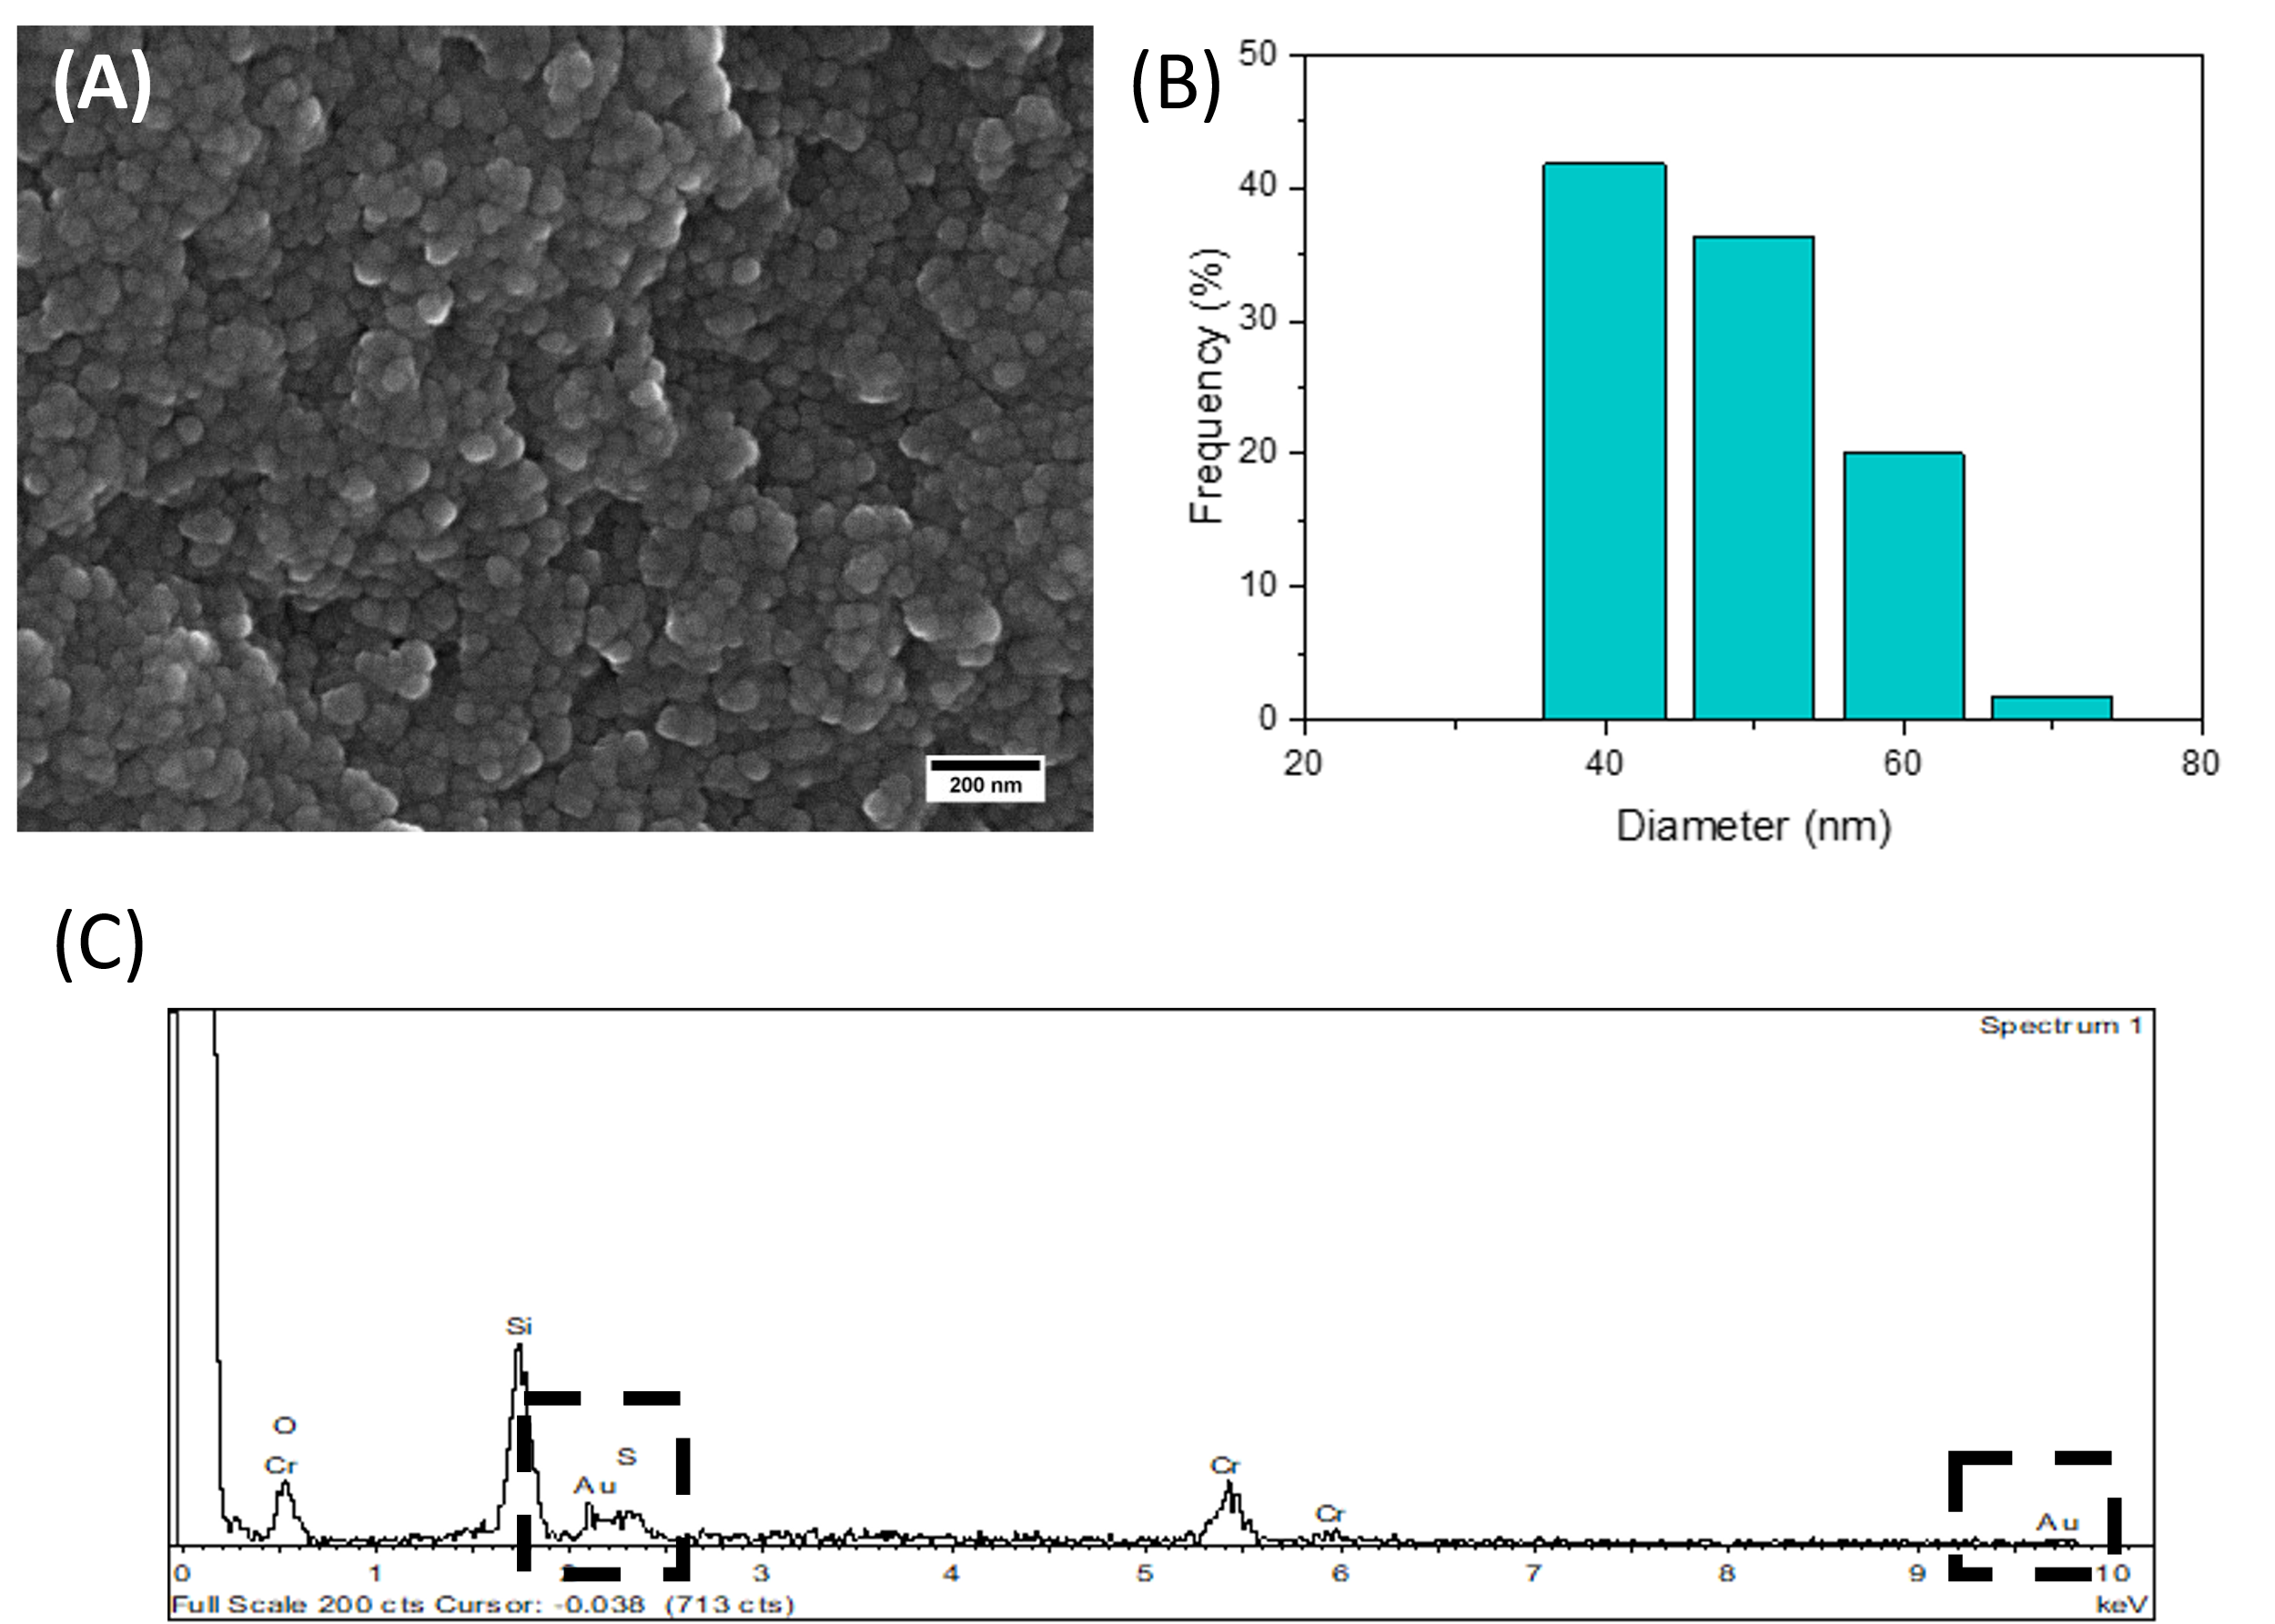


**Figure S3.** SEM characterization of MPTS-AuNC@MSN: (A) SEM image (magnification: 60 000×). (B) Particle size distribution (*d* = 49 ± 8 nm). (C) EDS spectrum shows the presence of Si, Au and S elements, confirming the incorporation of the AuNCs in the SiO2 structure.


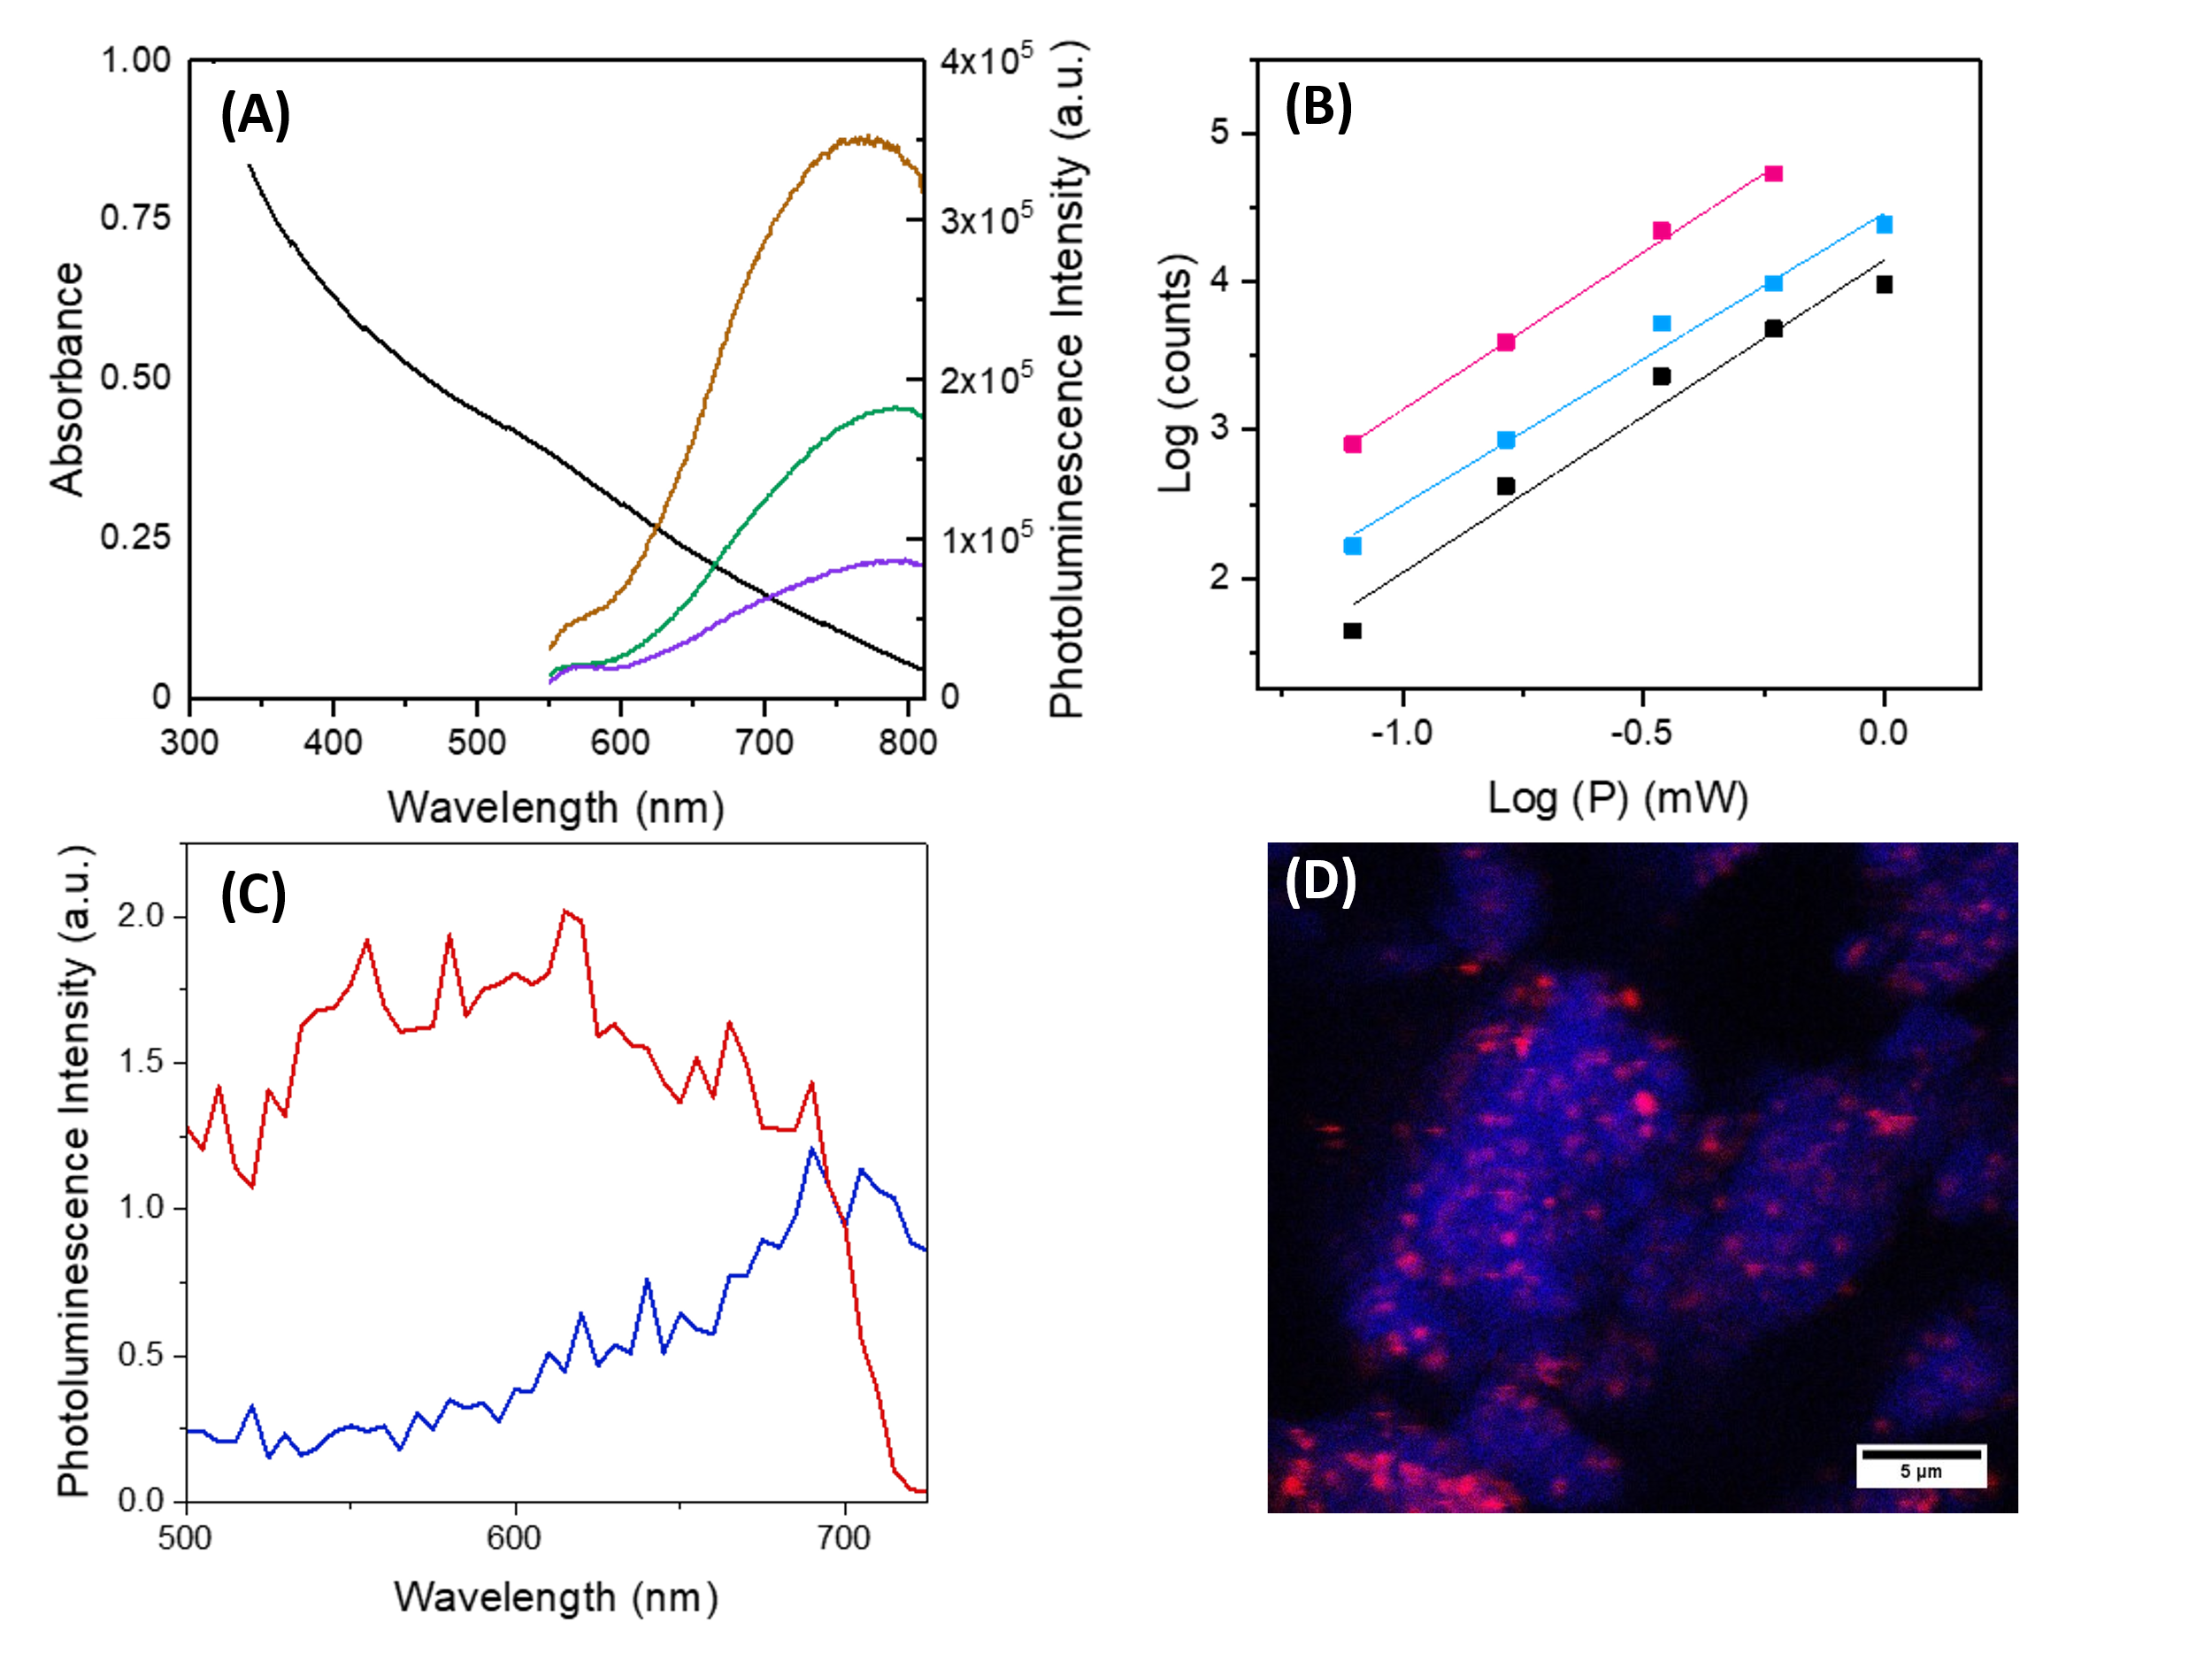


**Figure S4.** Optical characterization of MPTS-AuNCs@MSN in ethanol: (A) Linear optical properties (pink: UV-vis absorption spectrum; brown: emission spectrum by *λexc*=300 nm; green: emission spectrum *by λexc*=400 nm; purple: emission spectrum by *λexc*=500 nm). (B) Power dependence of the photoluminescence intensity upon two-photon excitation at 900 nm in several regions of interest (ROI) (black: ROI 1 (slope = 2.1; R2 = 0.968); pink: ROI 2 (slope = 2.1; R2 = 0.997); blue: ROI 3 (slope = 2.0; R2 = 0.987)). (C) Photoluminescence emission spectra (blue: one-photon excitation *λexc*=458 nm; red: two-photon excitation *λexc*=900 nm). (D) Confocal image (one photon excitation *λexc*=458 nm: blue; two photon excitation *λexc*=900 nm: red). Blue channel corresponds most probably to the Raman scattering from the SiO2, while the red channel corresponds to the non-linear response of the MPTS-AuNCs in the SiO2 (demonstrated by the quadratic dependence of the luminescence intensity withpower).


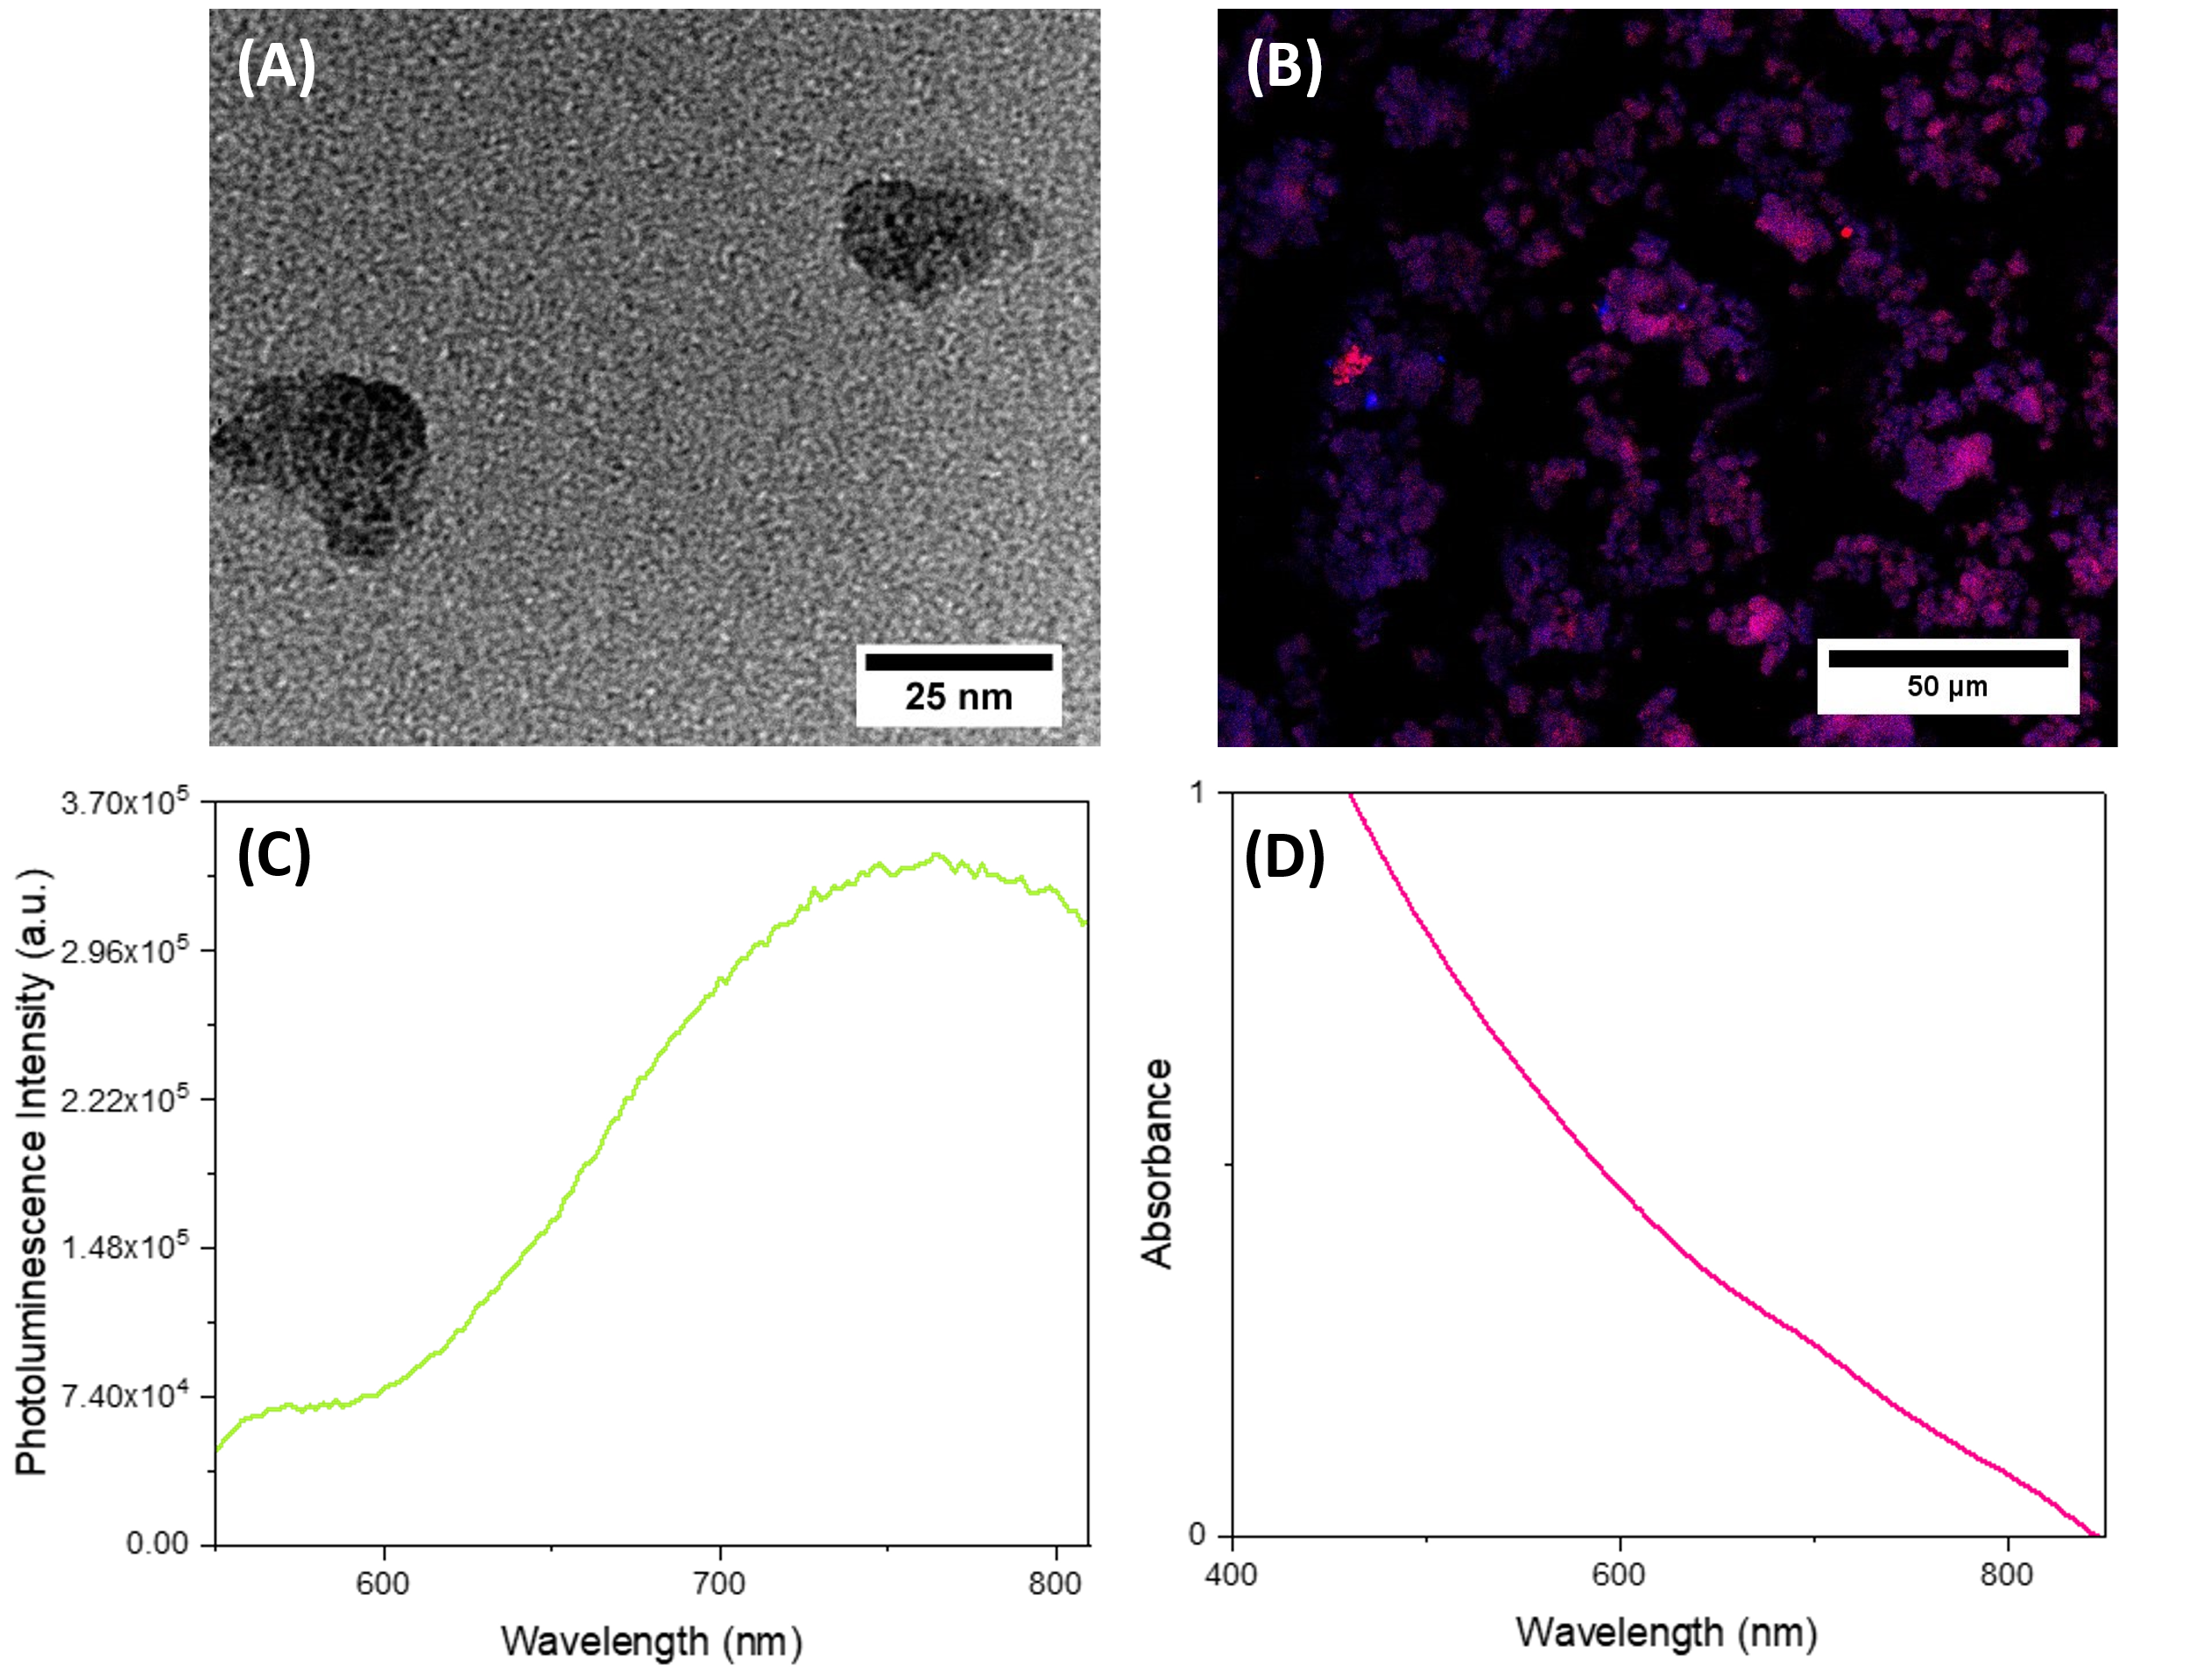


**Figure S5.** Characterization of MPTS-AuNCs@MSN with pH =10 adjusted using NaOH both in the starting solution containing CTAB and Au(III) and after TEOS addition: (A) TEM image (magnification: 800 000×). (B) Confocal (blue: *λexc* = 458 nm) and multiphoton (pink: *λexc* = 900 nm) image. (C) Photoluminescence emission spectrum (*λexc*=300 nm). (D) One-photon absorption spectrum.


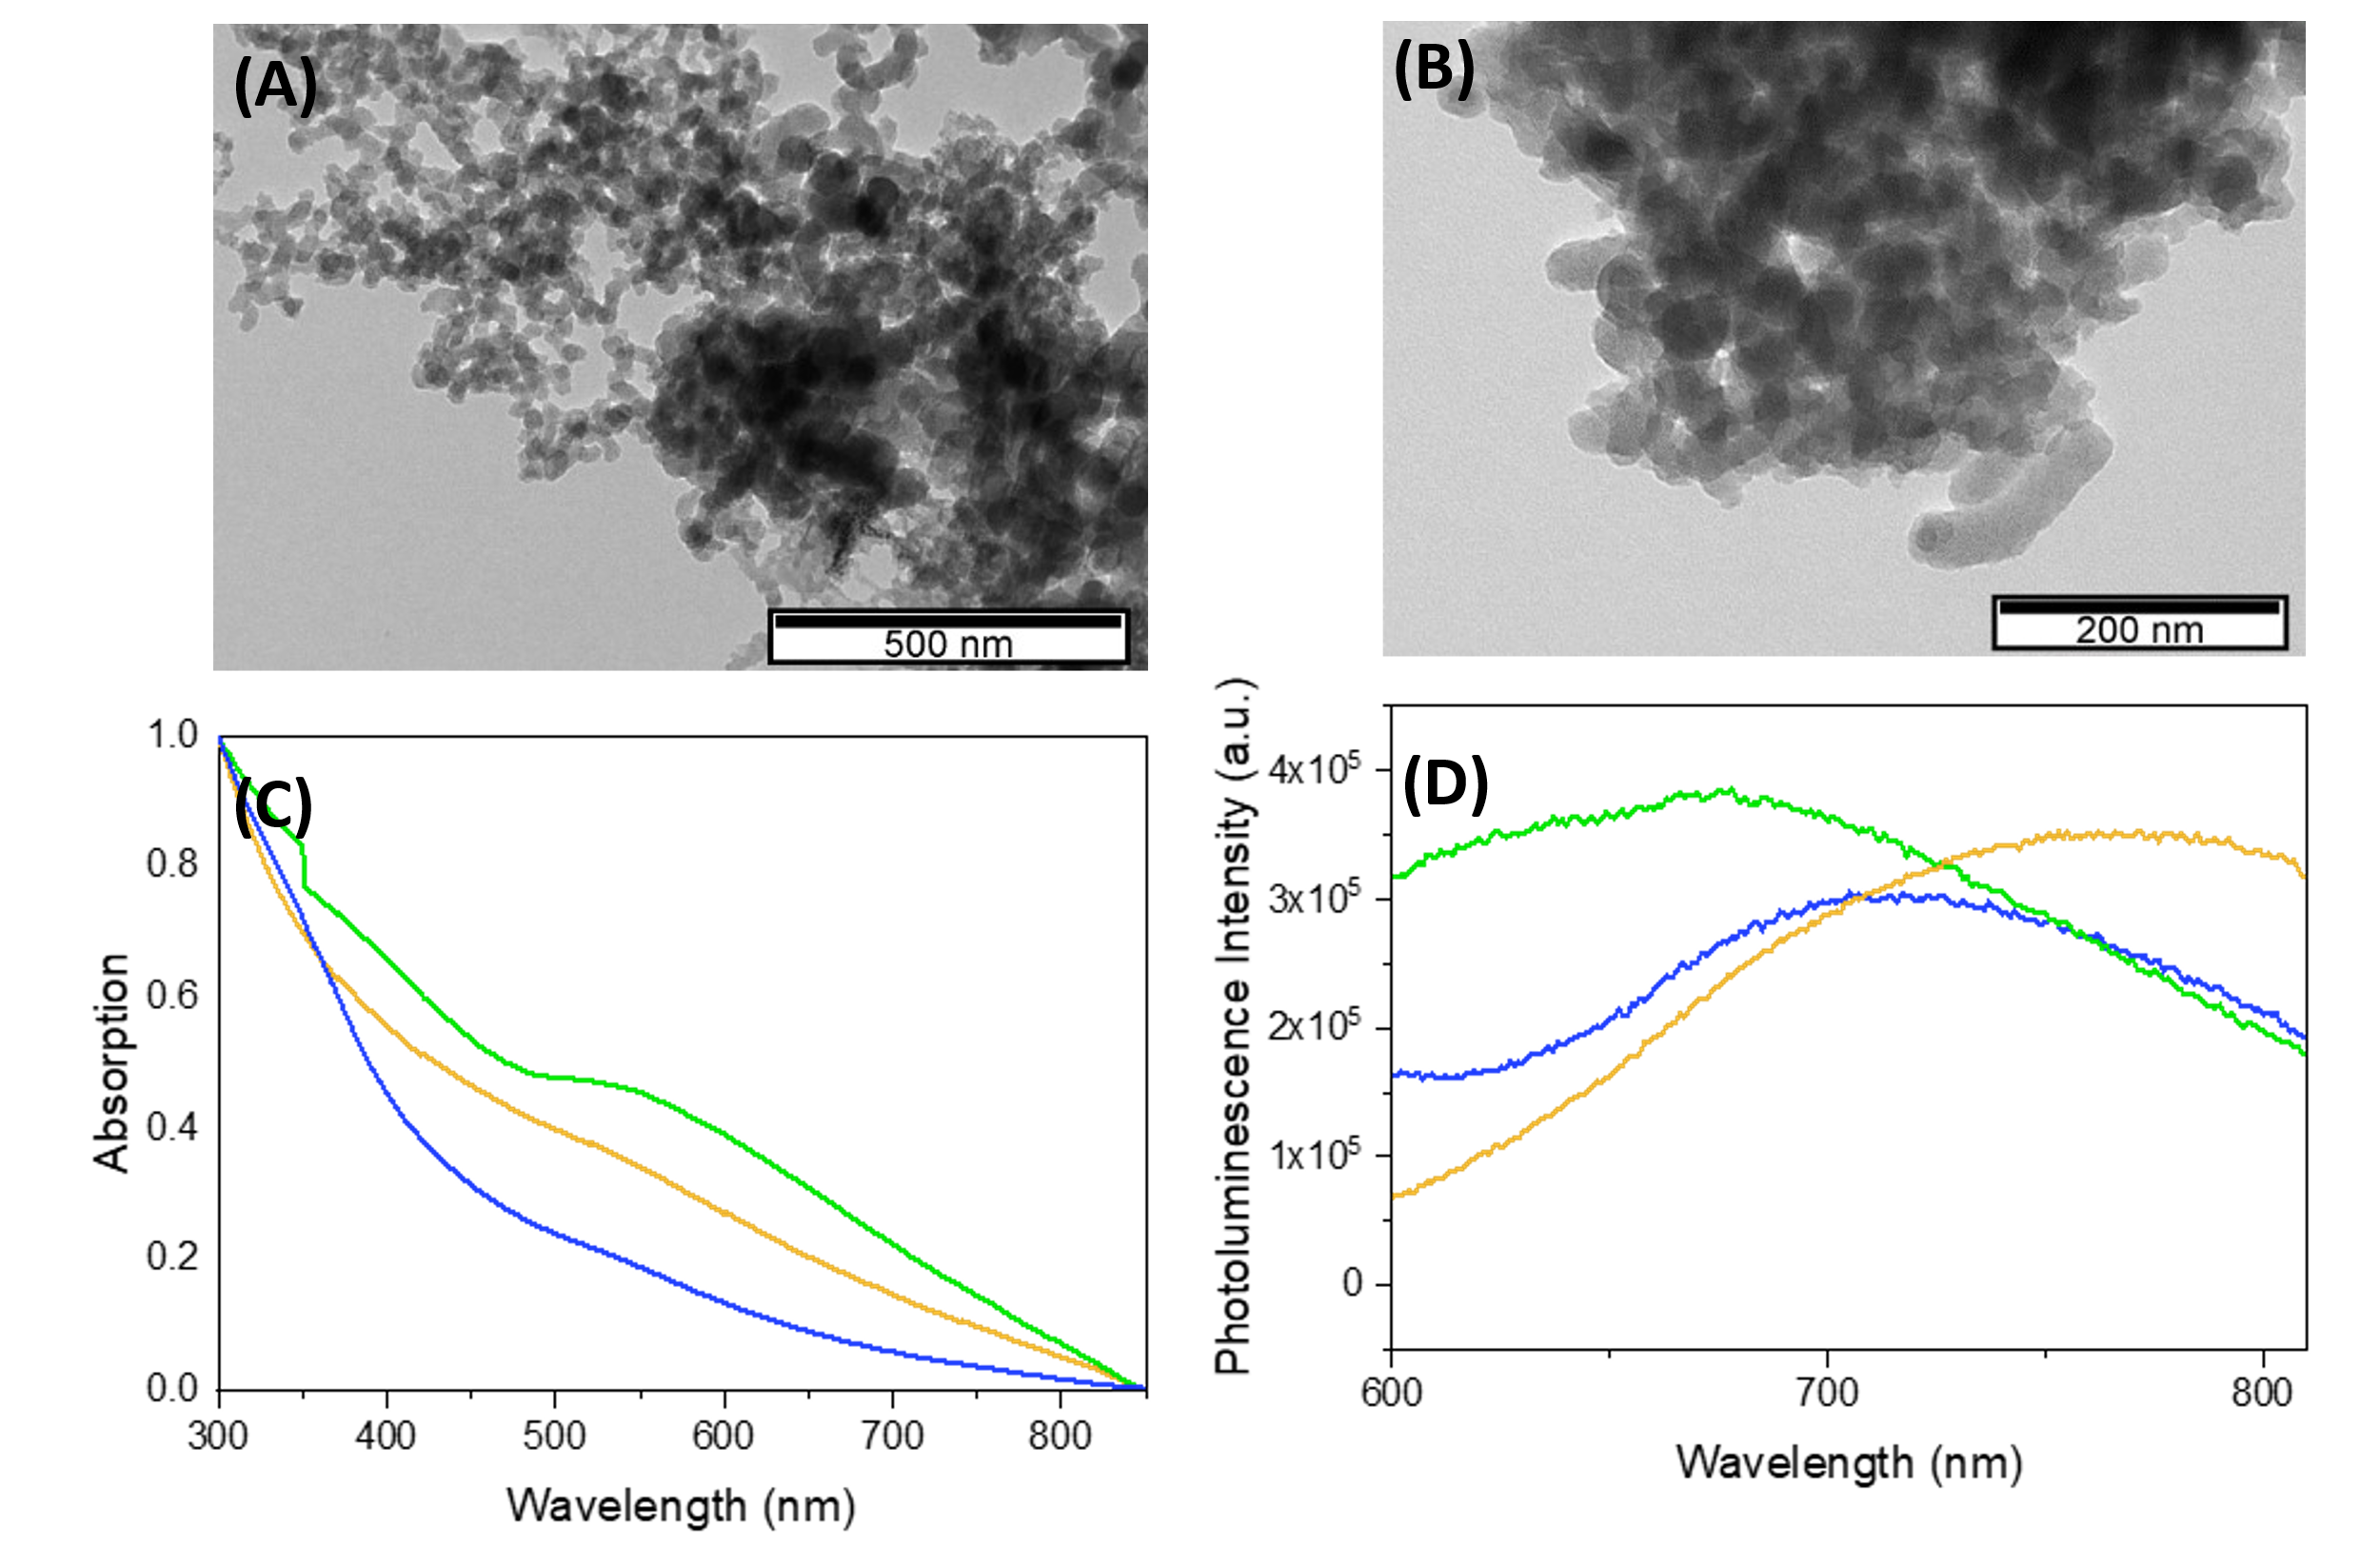


**Figure S6.** TEM image of MPTS-AuNCs@MSN synthesized at: (A) 35 °C (magnification: 20 000×). (B) 65 °C (magnification: 40 000×). One-photon optical properties of MPTS-AuNCs@MSN (orange: 30 °C; green: 35 °C; blue: 65 °C). (C) Absorption spectra. (D) Photoluminescence emission spectra by *λexc*=300 nm.


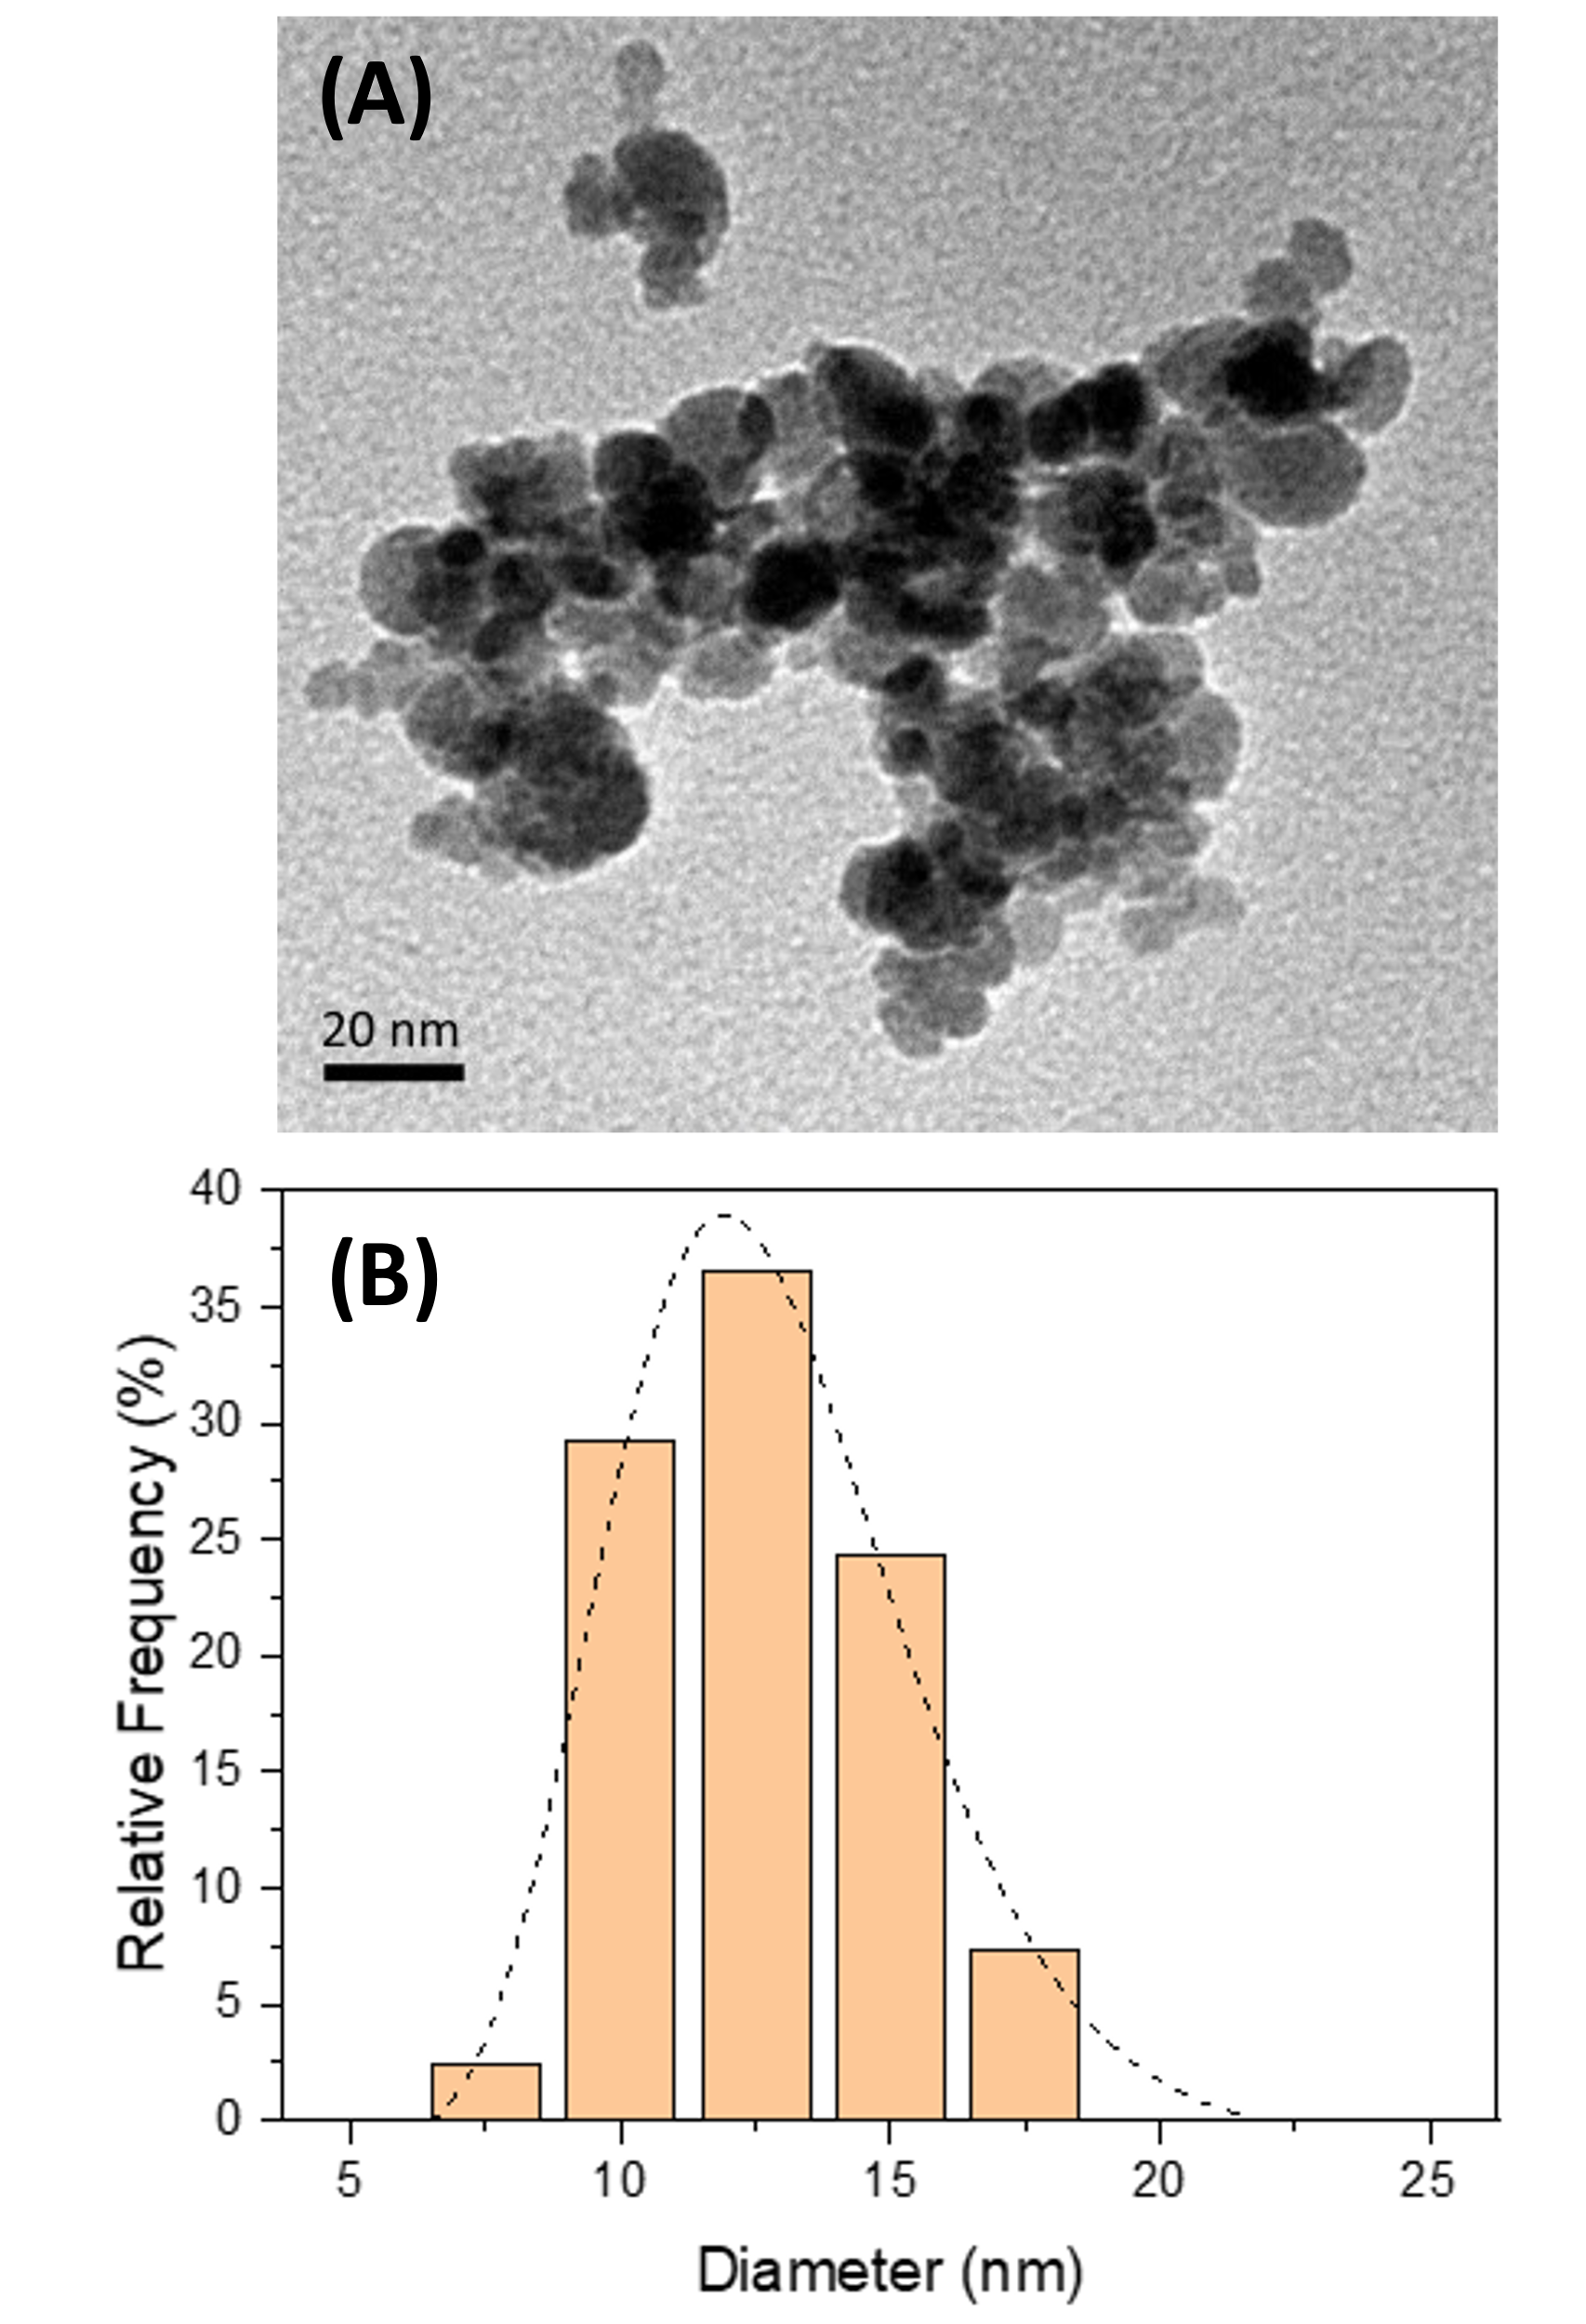


**Figure S7.** Morphological characterization of MnFe2O4 NPs: (A) TEM image (magnification: 500 000×). (B) TEM particle size distribution histogram with log-normal fit (*d* = 13; sigma = 3 nm; R2 = 0.992).


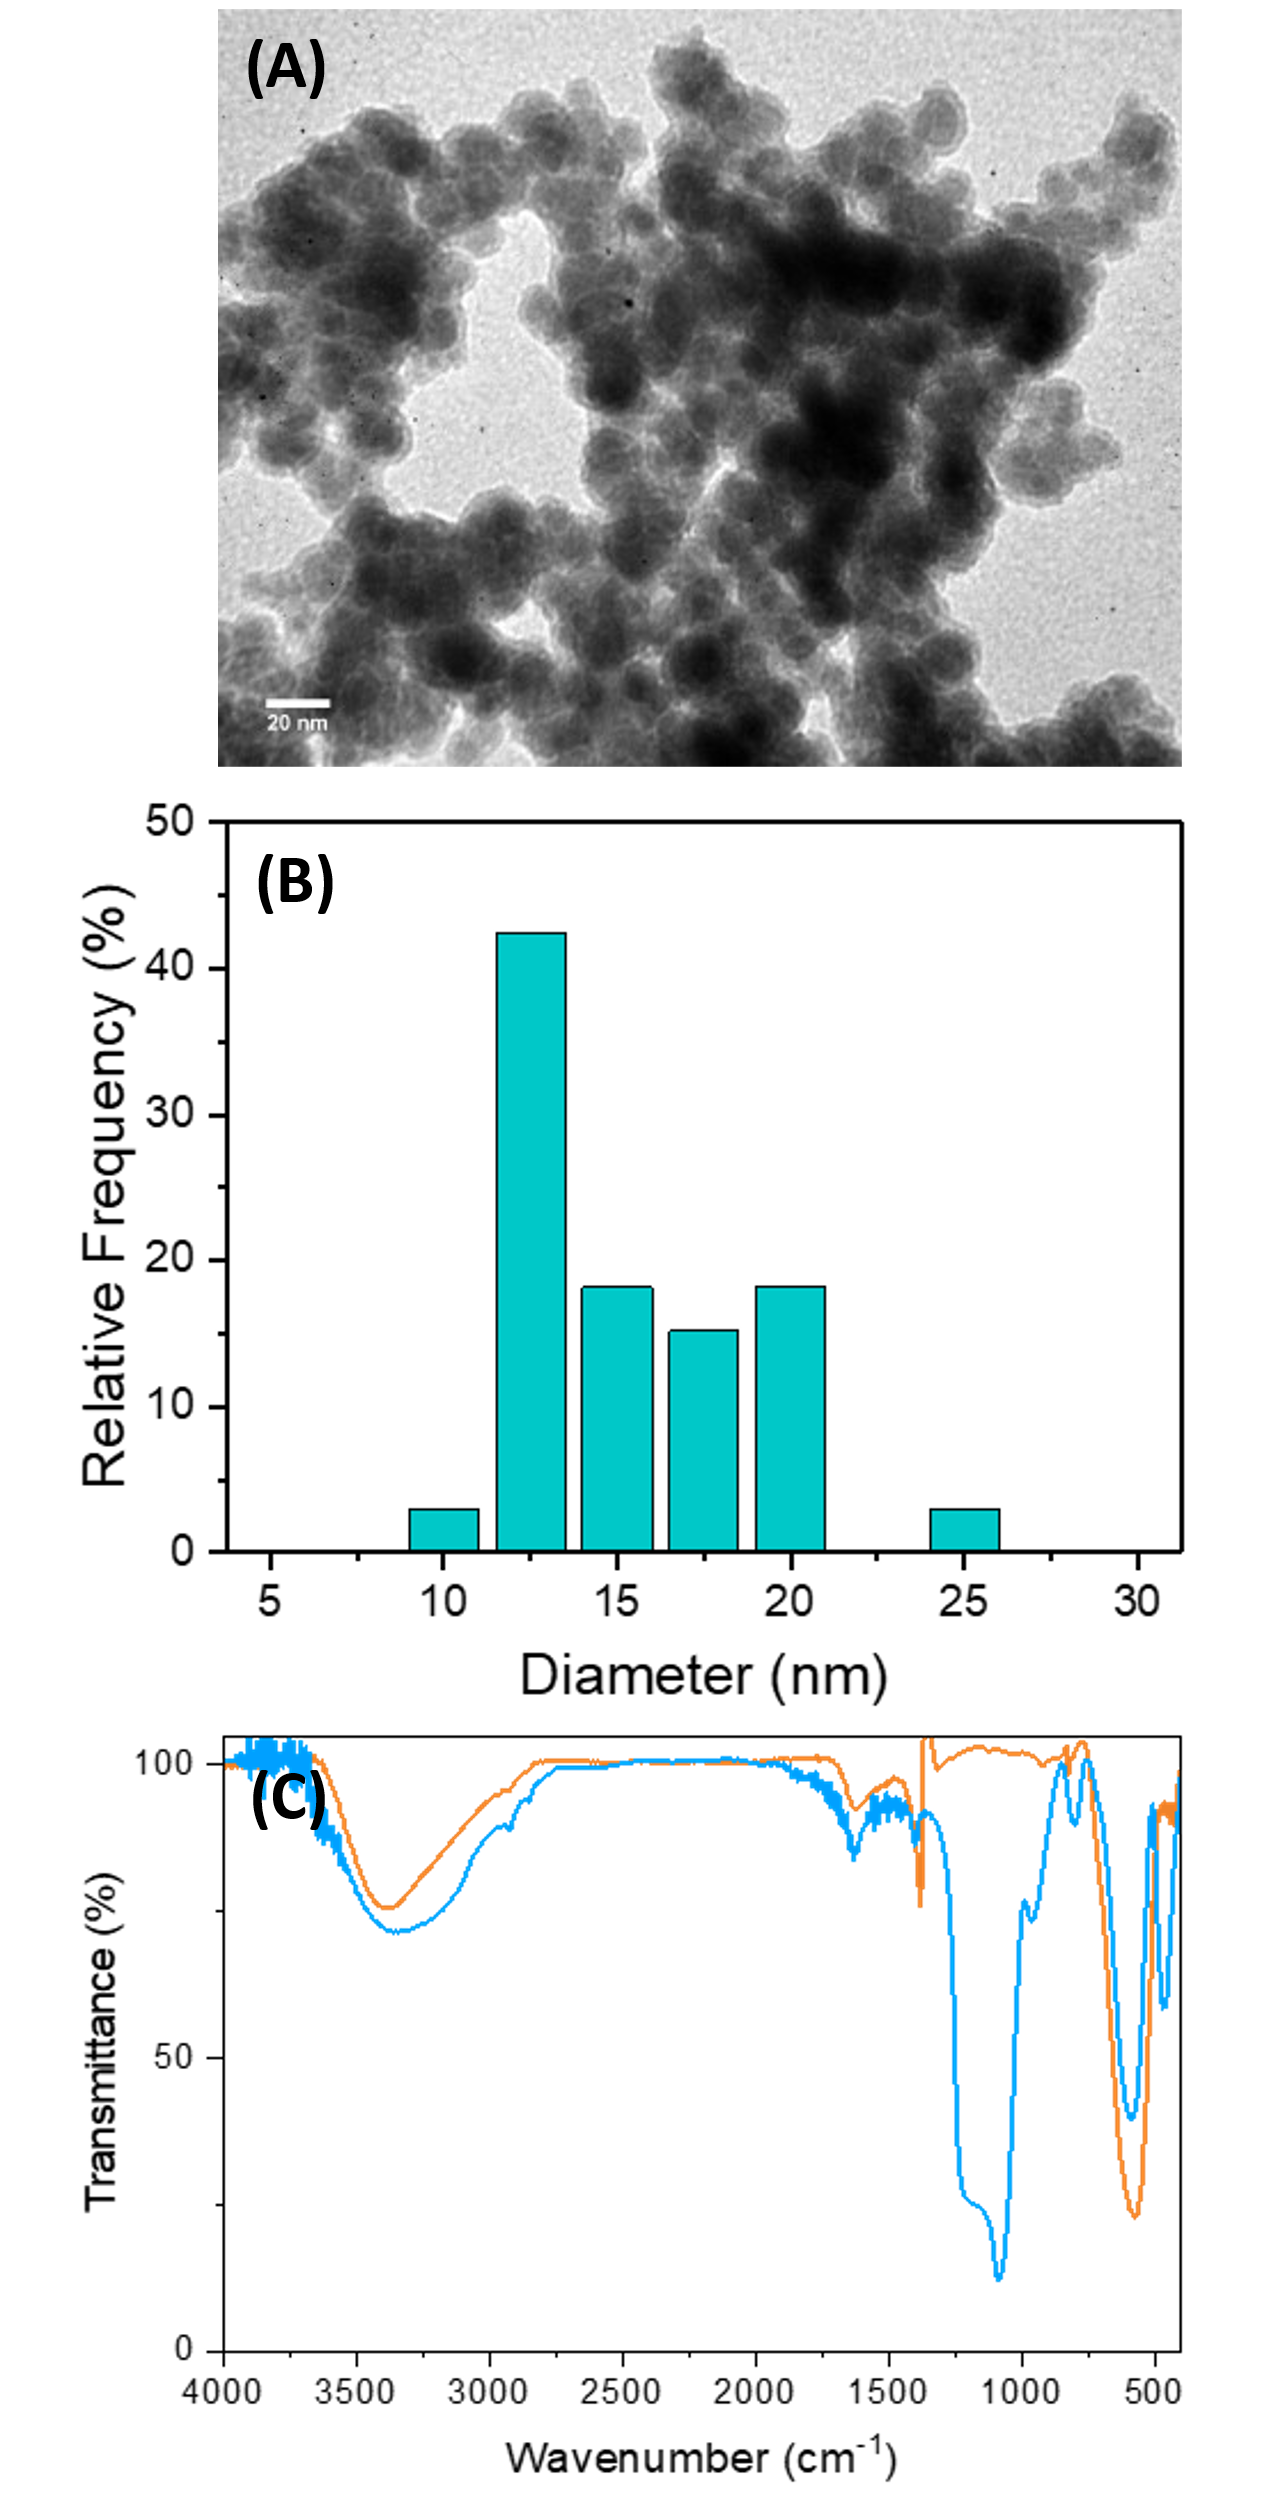


**Figure S8.** Characterization of Mn@SiO2: (A) TEM image (magnification: 500 000×). (B) TEM particle size distribution histogram. (C) FTIR spectra of MnFe2.6O4 (orange) and Mn@SiO2 (blue).


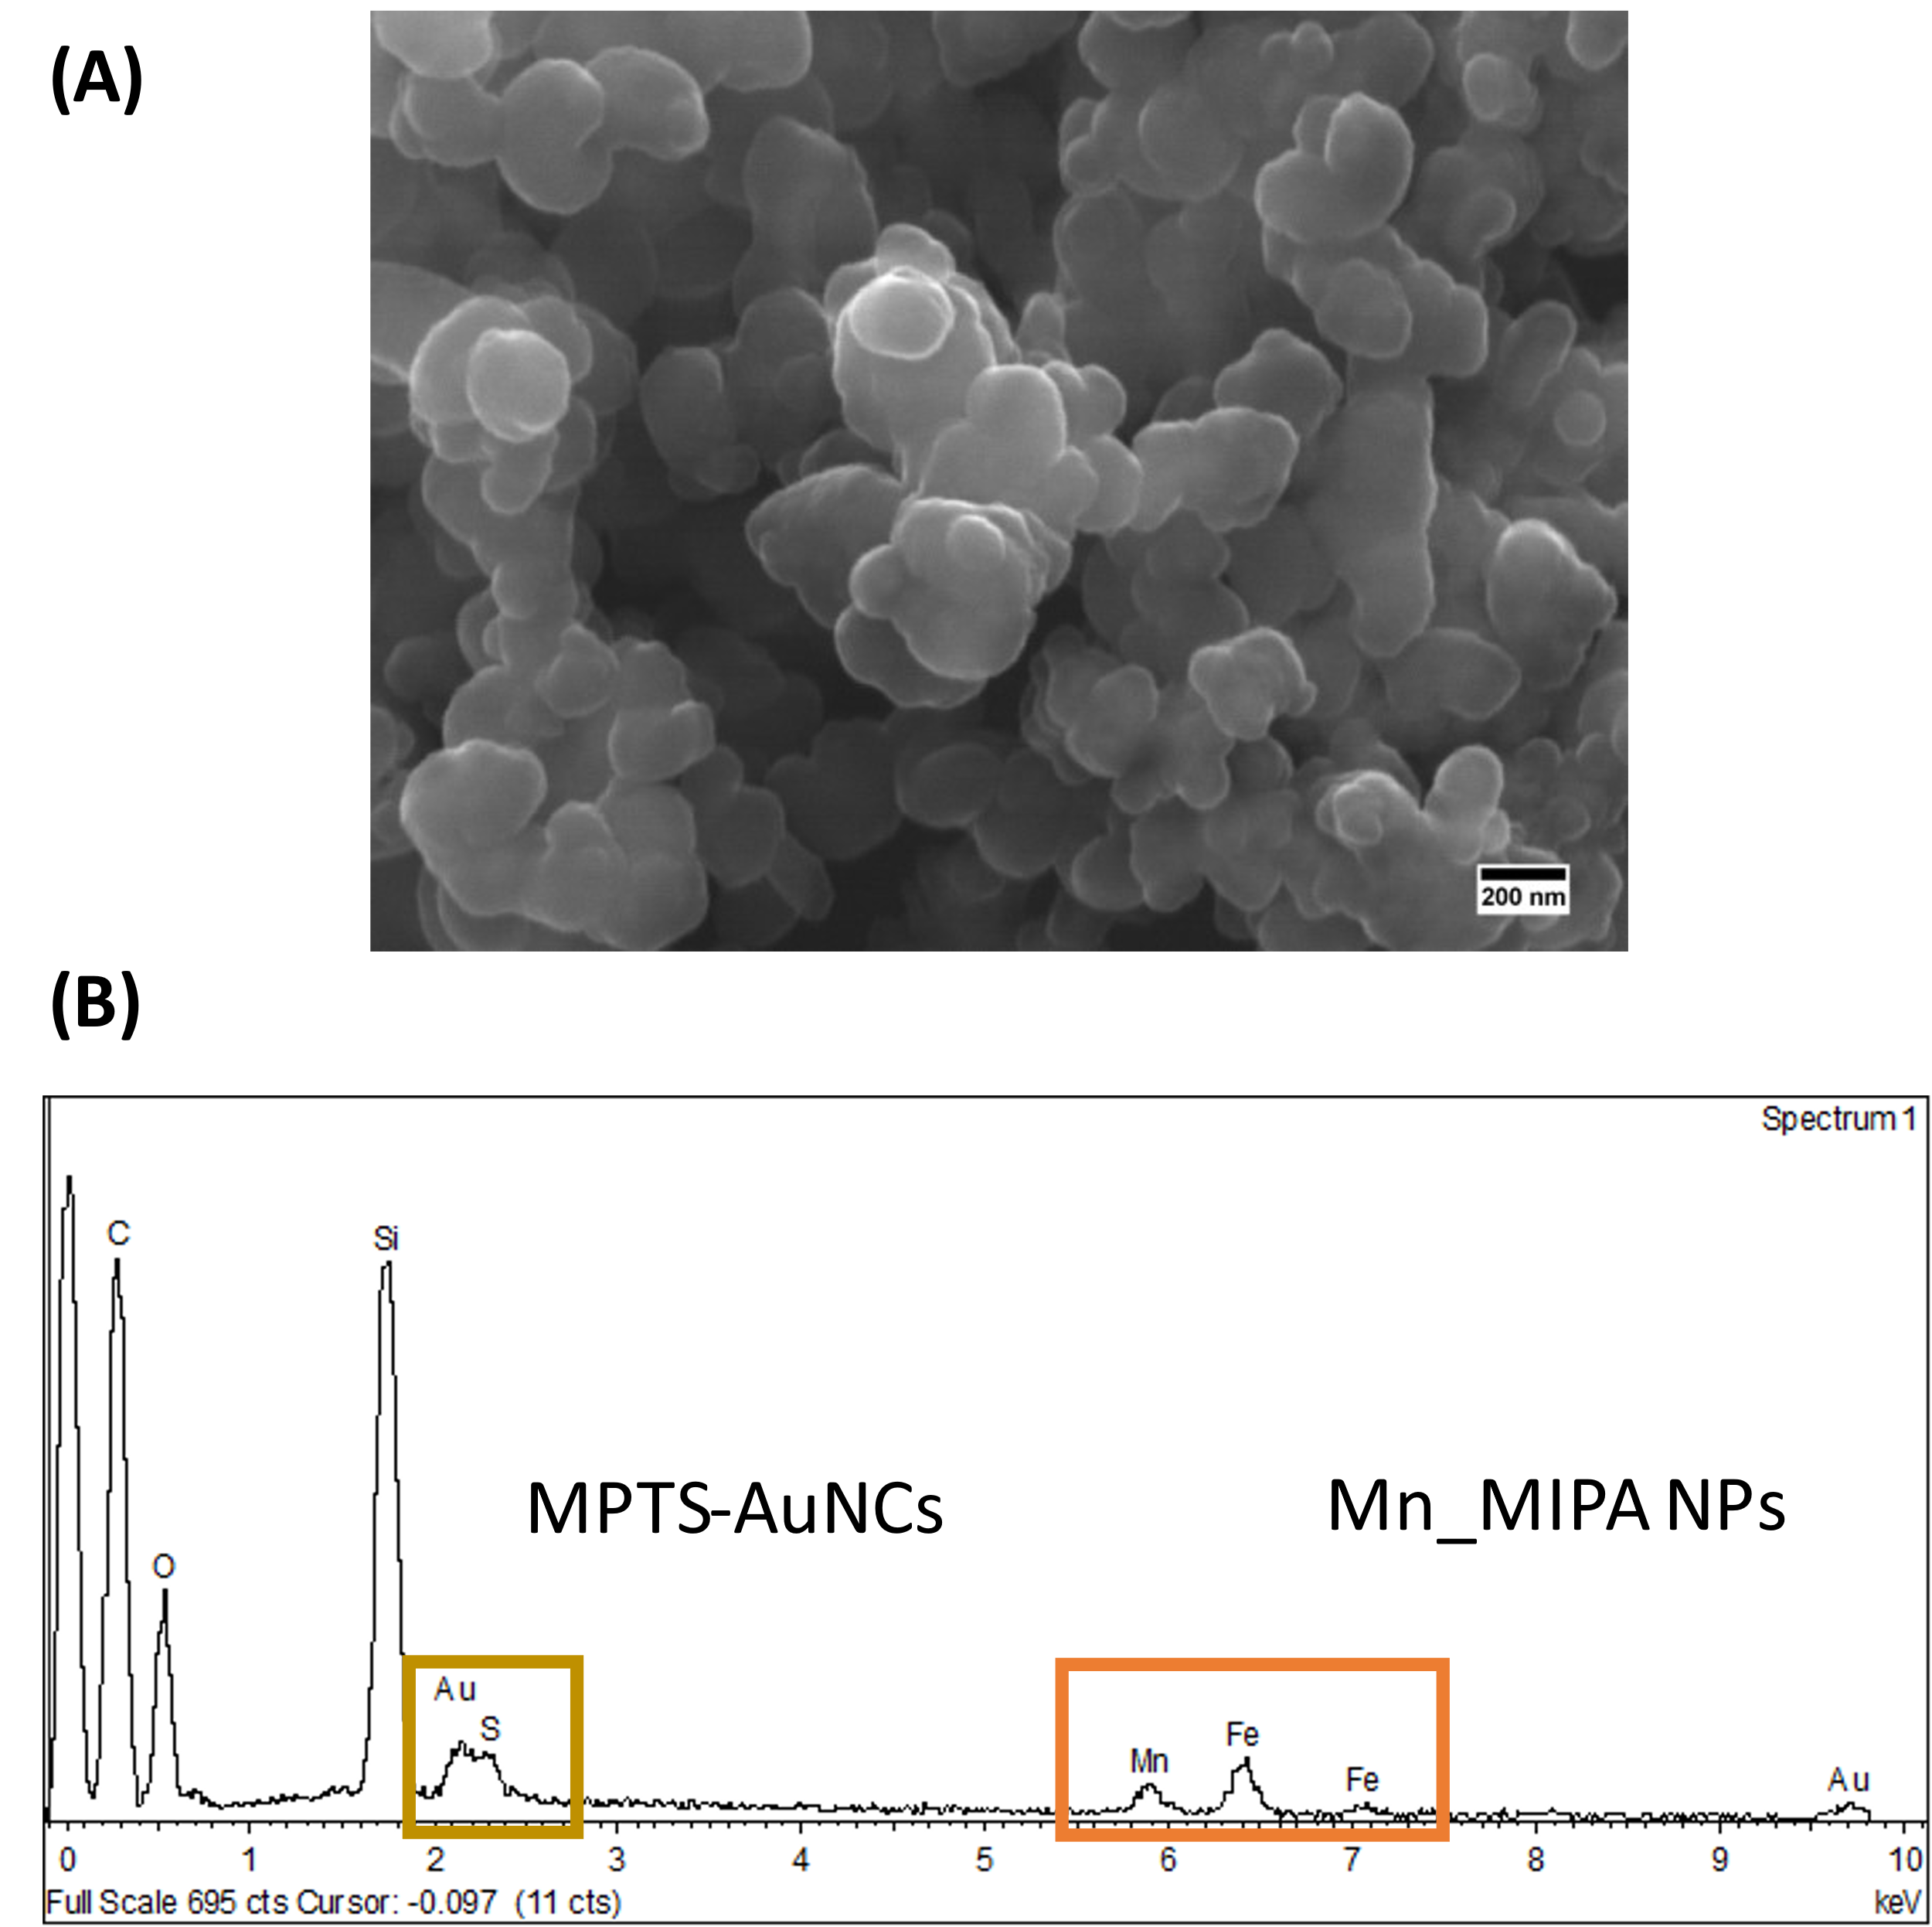


**Figure S9.** SEM-EDS characterization of Mn@SiO2@AuNCs : (A) SEM image (magnification: 60 000×). (B) EDS spectrum.


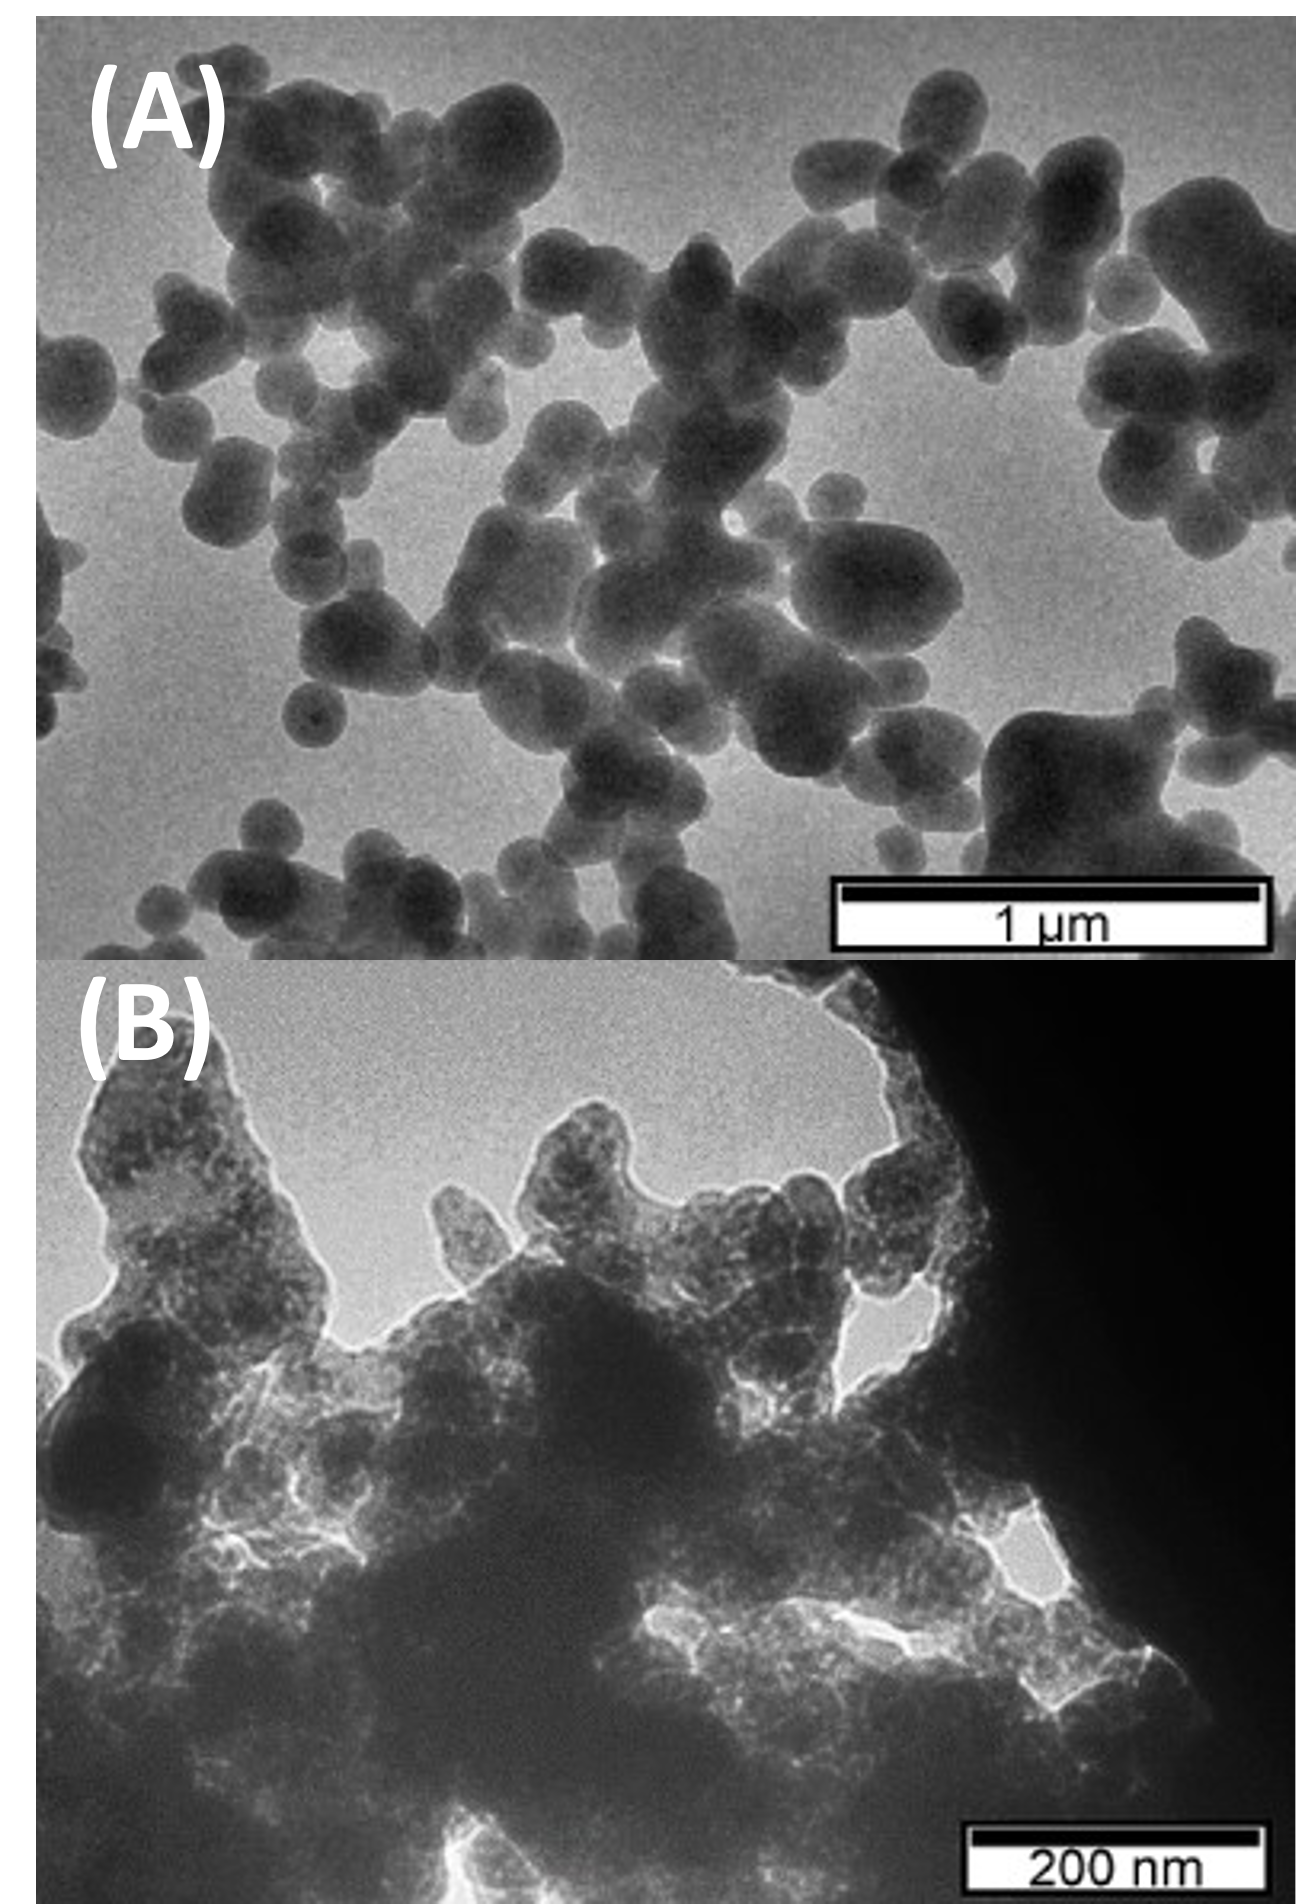


**Figure S10.** TEM images of (A) Au@MSN at 60 °C using TEA as base (magnification: 9 000×), (B) Mn@SiO2@MSN (magnification: 30 000×).


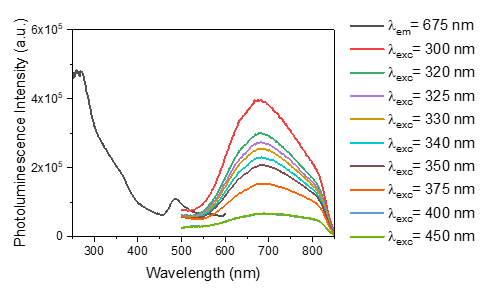


**Figure S11.** Linear optical properties of Mn@SiO2@AuNCs in water (pH 10): photoluminescence excitation spectrum (*λ*em=675 nm) and emission spectra (300 nm < *λ*exc < 450 nm).

1. Current affiliation: IFIMUP - Instituto de Física de Materiais Avançados, Nanotecnologia e Fotónica, Departamento de Física e Astronomia, Faculdade de Ciências, Universidade do Porto, Rua do Campo Alegre s/n, 4169-007, Porto, Portugal. [↑](#footnote-ref-1)
